# Supplementary material for: Effect of substituents on the ability of nickel Schiff base complexes with four pendant groups to bind to G-quadruplexes
Source: Royal Society of Chemistry journal article supplement (doi:10.1039/d4dt00448e), 2024-01-01
Supplement: d4dt00448e26.pdf [file d4dt00448e26.pdf]

## Supplementary Material

Effect of substituents on the ability of nickel Schiff base complexes with four pendant groups to bind to G-quadruplexes

Nawal Assadawi,<sup>a</sup> Myles Ferderer,<sup>a</sup> Nicholas Kusi-Appauh,<sup>a</sup> Haibo Yu,<sup>a</sup> Carolyn Dillon,<sup>a</sup> Ron Sluyter,<sup>a</sup> Christopher Richardson<sup>a</sup> and Stephen Ralph<sup>a</sup>

<sup>a</sup> Molecular Horizons and School of Chemistry and Molecular Bioscience, University of Wollongong, Northfields Avenue, Wollongong 2522, Australia

E-mail: sralph@uow.edu.au

**Table S1:** Crystal data and structure refinement for **(13)** and **(16)**.

| Identification code                                   | <b>(13)</b> (exp_84Ni20)                                              | <b>(16)</b> (exp_219_NA)                                           |
|-------------------------------------------------------|-----------------------------------------------------------------------|--------------------------------------------------------------------|
| Empirical formula                                     | C <sub>56</sub> H <sub>74.41</sub> N <sub>6</sub> NiO <sub>6.21</sub> | C <sub>41</sub> H <sub>72</sub> N <sub>6</sub> NiO <sub>16.5</sub> |
| Formula weight                                        | 989.61                                                                | 966.15                                                             |
| Temperature/K                                         | 149.99(10)                                                            | 150.01(10)                                                         |
| Crystal system                                        | monoclinic                                                            | triclinic                                                          |
| Space group                                           | <i>P</i> 2 <sub>1</sub> / <i>c</i>                                    | <i>P</i> -1                                                        |
| <i>a</i> /Å                                           | 10.7829(3)                                                            | 9.7651(2)                                                          |
| <i>b</i> /Å                                           | 21.9025(5)                                                            | 14.6637(3)                                                         |
| <i>c</i> /Å                                           | 22.2389(5)                                                            | 16.8916(3)                                                         |
| $\alpha$ /°                                           | 90                                                                    | 78.2060(10)                                                        |
| $\beta$ /°                                            | 99.678(3)                                                             | 83.1790(10)                                                        |
| $\gamma$ /°                                           | 90                                                                    | 89.109(2)                                                          |
| Volume/Å <sup>3</sup>                                 | 5177.4(2)                                                             | 2350.83(8)                                                         |
| <i>Z</i>                                              | 4                                                                     | 2                                                                  |
| $\rho_{\text{calc}}$ /cm <sup>3</sup>                 | 1.270                                                                 | 1.365                                                              |
| $\mu$ /mm <sup>-1</sup>                               | 0.431                                                                 | 0.487                                                              |
| F(000)                                                | 2120.0                                                                | 1034.0                                                             |
| Crystal size/mm <sup>3</sup>                          | 0.41 × 0.19 × 0.18                                                    | 0.7 × 0.2 × 0.19                                                   |
| Radiation                                             | Mo K $\alpha$ ( $\lambda$ = 0.71073Å)                                 | MoK $\alpha$ ( $\lambda$ = 0.71073Å)                               |
| 2 $\Theta$ range for data collection/°                | 4.87 to 56.566                                                        | 4.132 to 58.26                                                     |
| Index ranges                                          | -12 ≤ <i>h</i> ≤ 14, -28 ≤ <i>k</i> ≤ 29, -28 ≤ <i>l</i> ≤ 29         | -13 ≤ <i>h</i> ≤ 13, -20 ≤ <i>k</i> ≤ 20, -23 ≤ <i>l</i> ≤ 23      |
| Reflections collected                                 | 39931                                                                 | 104375                                                             |
| Independent reflections                               | 12745 [R <sub>int</sub> = 0.0398, R <sub>sigma</sub> = 0.0584]        | 12431 [R <sub>int</sub> = 0.0335, R <sub>sigma</sub> = 0.0178]     |
| Data/restraints/parameters                            | 12745/181/659                                                         | 12431/80/675                                                       |
| Goodness-of-fit on F <sup>2</sup>                     | 1.025                                                                 | 1.035                                                              |
| Final R indexes [ <i>I</i> ≥ 2 $\sigma$ ( <i>I</i> )] | R <sub>1</sub> = 0.0639, wR <sub>2</sub> = 0.1480                     | R <sub>1</sub> = 0.0385, wR <sub>2</sub> = 0.1051                  |
| Final R indexes [all data]                            | R <sub>1</sub> = 0.1032, wR <sub>2</sub> = 0.1661                     | R <sub>1</sub> = 0.0469, wR <sub>2</sub> = 0.1109                  |
| Largest diff. peak/hole / e Å <sup>-3</sup>           | 0.96/-0.42                                                            | 0.91/-0.49                                                         |
| CCDC                                                  | 2327214                                                               | 2327215                                                            |

**Table S2:** Binding free energies obtained from docking studies performed using nickel Schiff base complexes and either 1KF1 or 1KBD.

| Complex     | 1KF1(qDNA)                         |                           | 1KBD (dsDNA)                       |                           |
|-------------|------------------------------------|---------------------------|------------------------------------|---------------------------|
|             | $\Delta G$ (kcal/mol) <sup>a</sup> | Binding mode <sup>b</sup> | $\Delta G$ (kcal/mol) <sup>a</sup> | Binding mode <sup>b</sup> |
| <b>(4)</b>  | $-9.6 \pm 0.1$                     | Top, end stacking         | $-8.8 \pm 0.1$                     | Minor groove              |
| <b>(5)</b>  | $-9.9 \pm 0.1$                     | Top, end stacking         | $-8.8 \pm 0.1$                     | Minor groove              |
| <b>(6)</b>  | $-9.4 \pm 0.1$                     | Top, end stacking         | $-8.3 \pm 0.2$                     | Minor groove              |
| <b>(7)</b>  | $-9.0 \pm 0.1$                     | Top, end stacking         | $-8.4 \pm 0.1$                     | Minor groove              |
| <b>(8)</b>  | $-8.7 \pm 0.1$                     | Top, end stacking         | $-8.6 \pm 0.1$                     | Minor groove              |
| <b>(9)</b>  | $-8.3 \pm 0.1$                     | Bottom, end stacking      | $-8.0 \pm 0.1$                     | Minor groove              |
| <b>(10)</b> | $-8.6 \pm 0.1$                     | Top, end stacking         | $-8.4 \pm 0.1$                     | Minor groove              |
| <b>(11)</b> | $-9.0 \pm 0.1$                     | Top, end stacking         | $-8.4 \pm 0.1$                     | Minor groove              |
| <b>(12)</b> | $-8.6 \pm 0.1$                     | Bottom, end stacking      | $-8.1 \pm 0.1$                     | Minor groove              |
| <b>(13)</b> | $-8.6 \pm 0.1$                     | Bottom, end stacking      | $-8.4 \pm 0.1$                     | Minor groove              |
| <b>(14)</b> | $-8.8 \pm 0.1$                     | Top, groove               | $-8.5 \pm 0.1$                     | Minor groove              |
| <b>(15)</b> | $-9.1 \pm 0.1$                     | Top, end stacking         | $-8.7 \pm 0.1$                     | Minor groove              |
| <b>(16)</b> | $-9.2 \pm 0.1$                     | Top, groove               | $-8.9 \pm 0.1$                     | Minor groove              |
| <b>(17)</b> | $-8.9 \pm 0.1$                     | Top, groove               | $-8.3 \pm 0.1$                     | Minor groove              |

<sup>a</sup> Average values of  $\Delta G$  with standard errors obtained from the top five docking scores.

<sup>b</sup> "Top" or "Bottom" indicates which terminal G-tetrad was the preferred binding site.

**Table S3:** IC<sub>50</sub> values derived from MTT assays performed using THP-1 leukemia cells and different nickel Schiff base complexes.

| <b>Complex</b> | <b>IC<sub>50</sub> (μM)<sup>a</sup></b> |
|----------------|-----------------------------------------|
| <b>(18)</b>    | 10.6 ± 2.0                              |
| <b>(19)</b>    | 3.1 ± 0.7                               |
| <b>(21)</b>    | 5.1 ± 1.3                               |
| <b>(22)</b>    | 10.0 ± 0.2                              |

<sup>a</sup> Error bars represent standard error of the mean for n = 3.

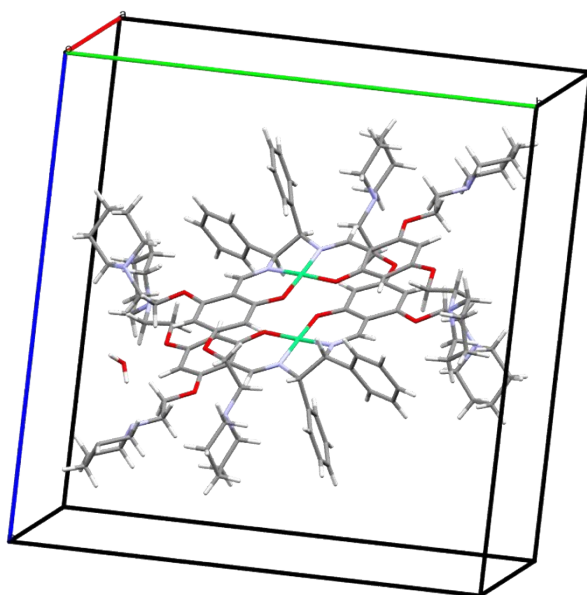

(a)

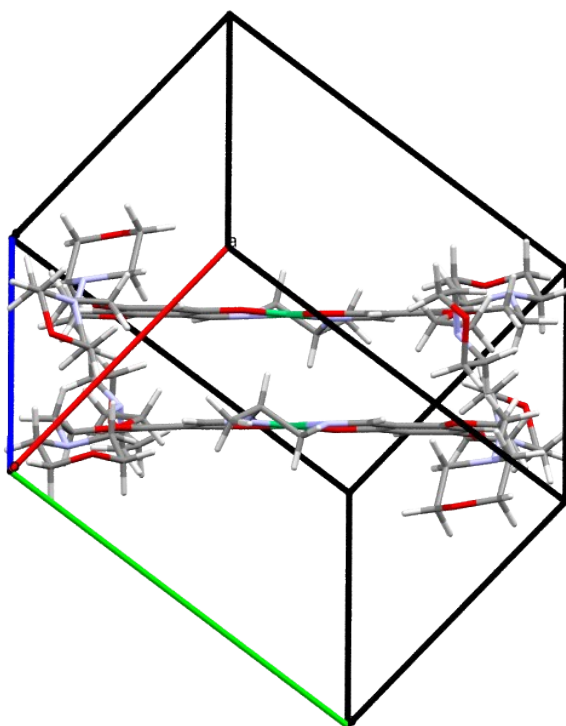

(b)

**Figure S1:** Arrangement of the nickel molecules in the solid-state structures of **(13)** and **(16)**:  
(a) Complex **(13)**. (b) Complex **(16)**.

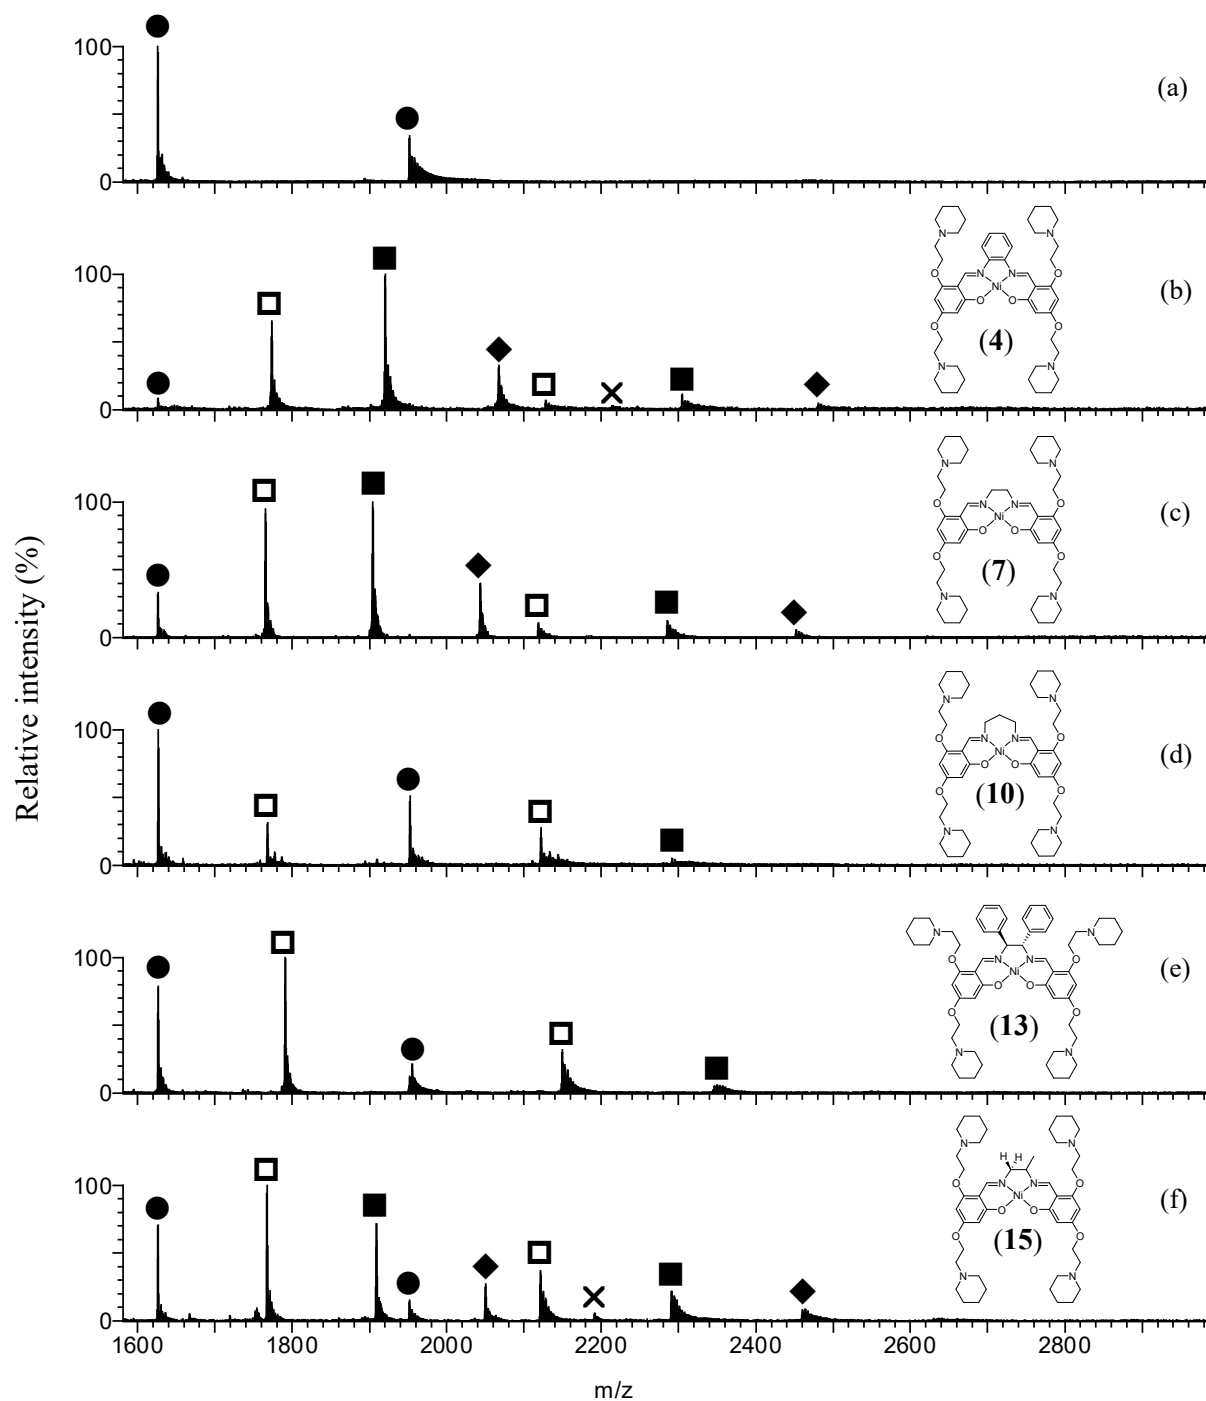

**Figure S2:** Negative ion ESI mass spectra of solutions containing a 6:1 ratio of different nickel Schiff base complexes and D2: (a) D2 only; (b) D2 + **(4)**; (c) D2 + **(7)**; (d) D2 + **(10)**; (e) D2 + **(15)** and (f) D2 + **(13)**. ● = Free D2; □ = [D2 + 1(Ni)]; ■ = [D2 + 2(Ni)]; ◆ = [D2 + 3(Ni)]; ✕ = [D2 + 4(Ni)].

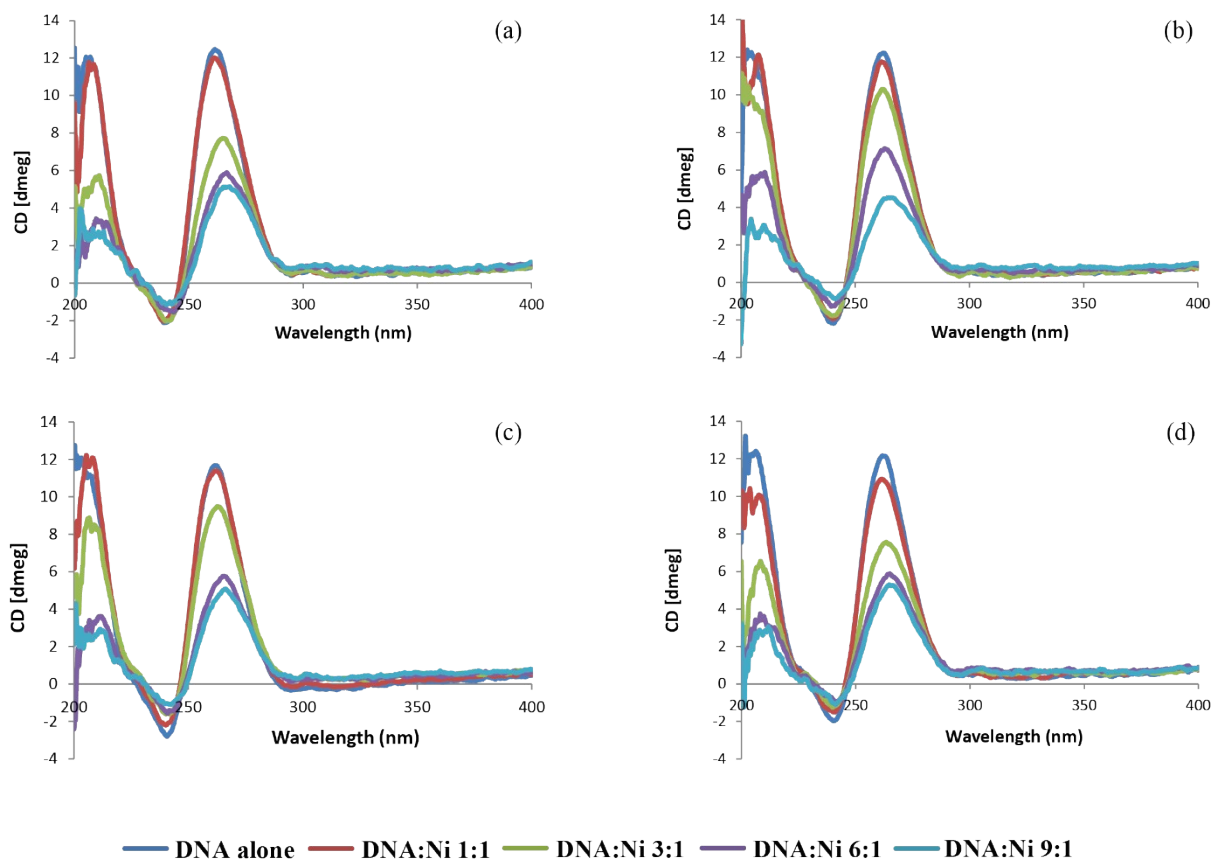

**Figure S3:** Circular dichroism spectra (200-400 nm) of solutions containing different ratios of nickel Schiff base complexes and *c-kit1*: (a) *c-kit1*+ (**7**); (b) *c-kit1*+ (**10**); (c) *c-kit1*+ (**13**) and (d) *c-kit1*+ (**15**).

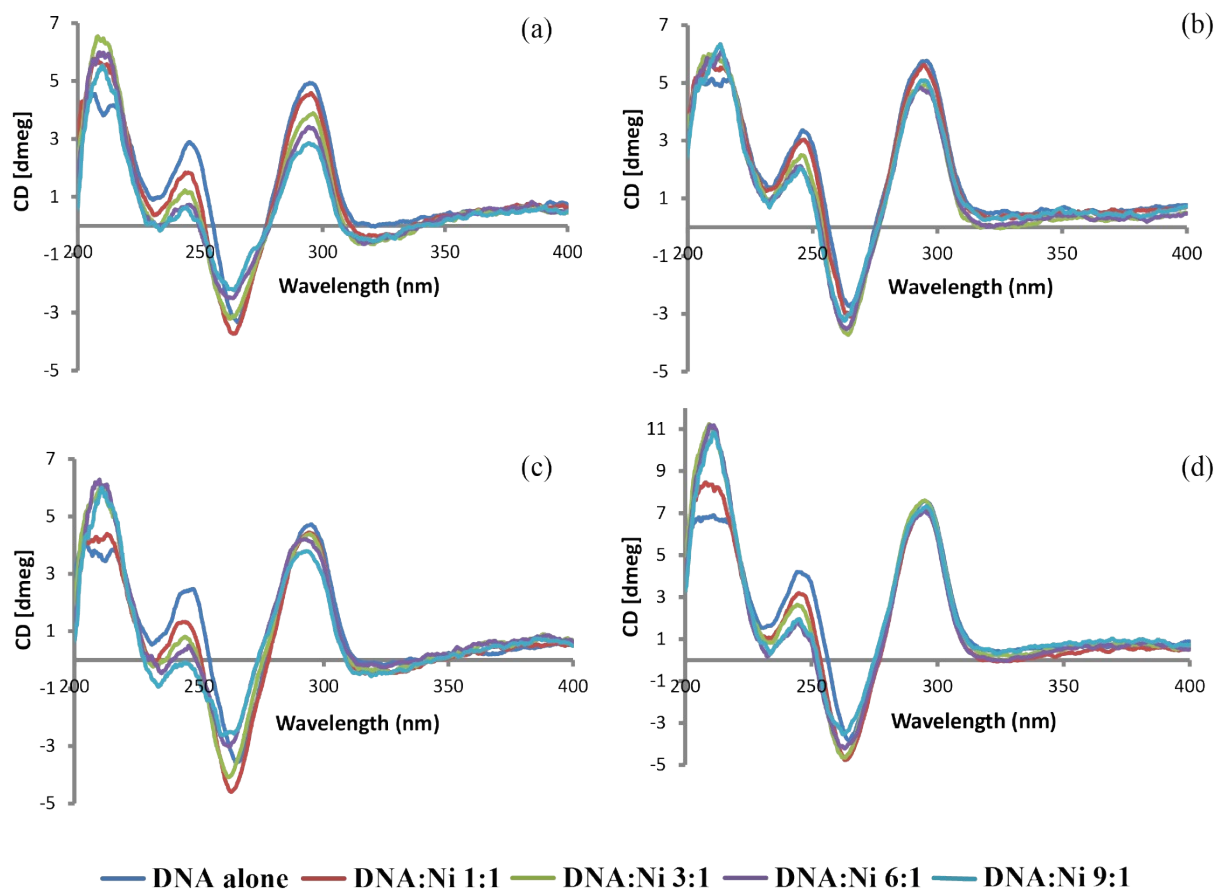

**Figure S4:** Circular dichroism spectra (200-400 nm) of solutions containing different ratios of nickel Schiff base complexes and anti-parallel Q1: (a) Q1 + (**7**); (b) Q1 + (**10**); (c) Q1 + (**13**) and (d) Q1 + (**15**).



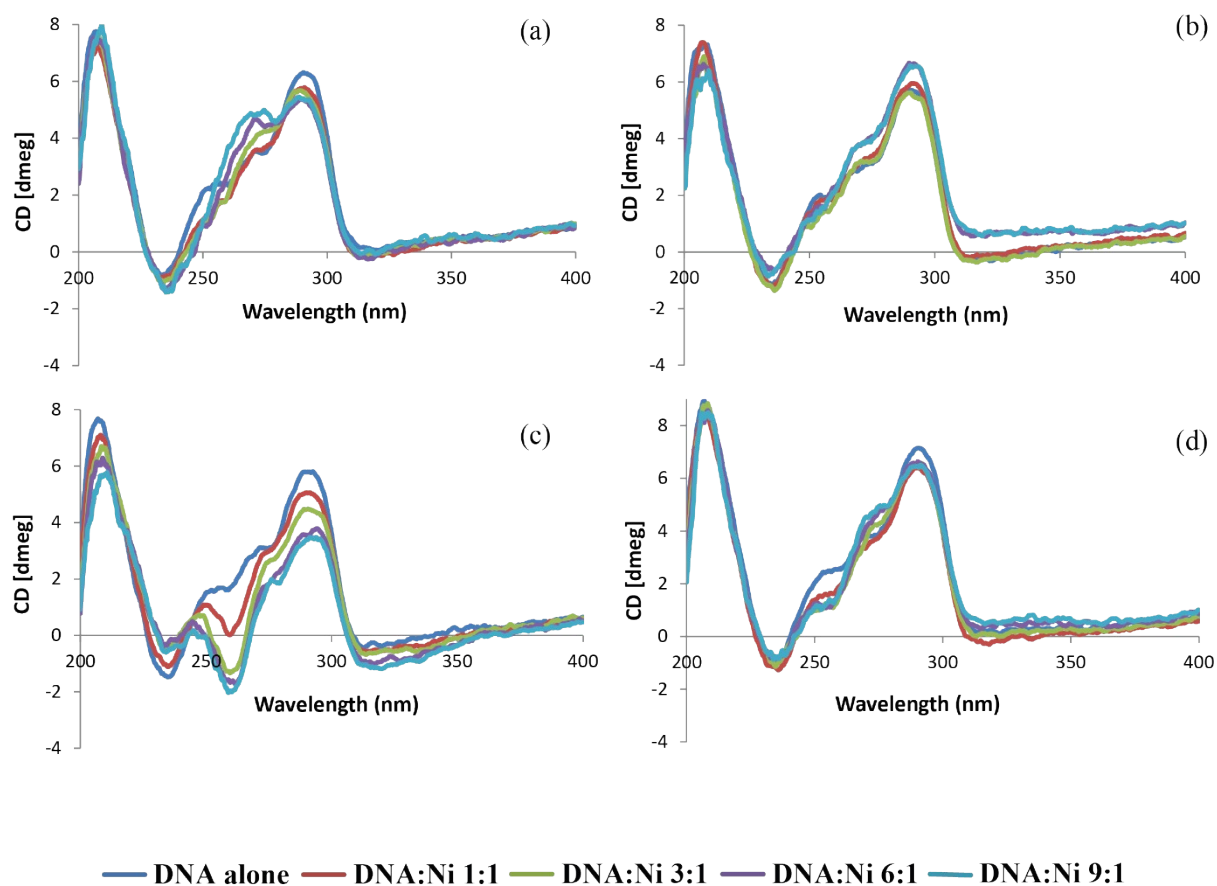

**Figure S5:** Circular dichroism spectra (200-400 nm) of solutions containing different ratios of nickel Schiff base complexes and hybrid Q1: (a) Q1 + (**7**); (b) Q1 + (**10**); (c) Q1 + (**13**) and (d) Q1 + (**15**).

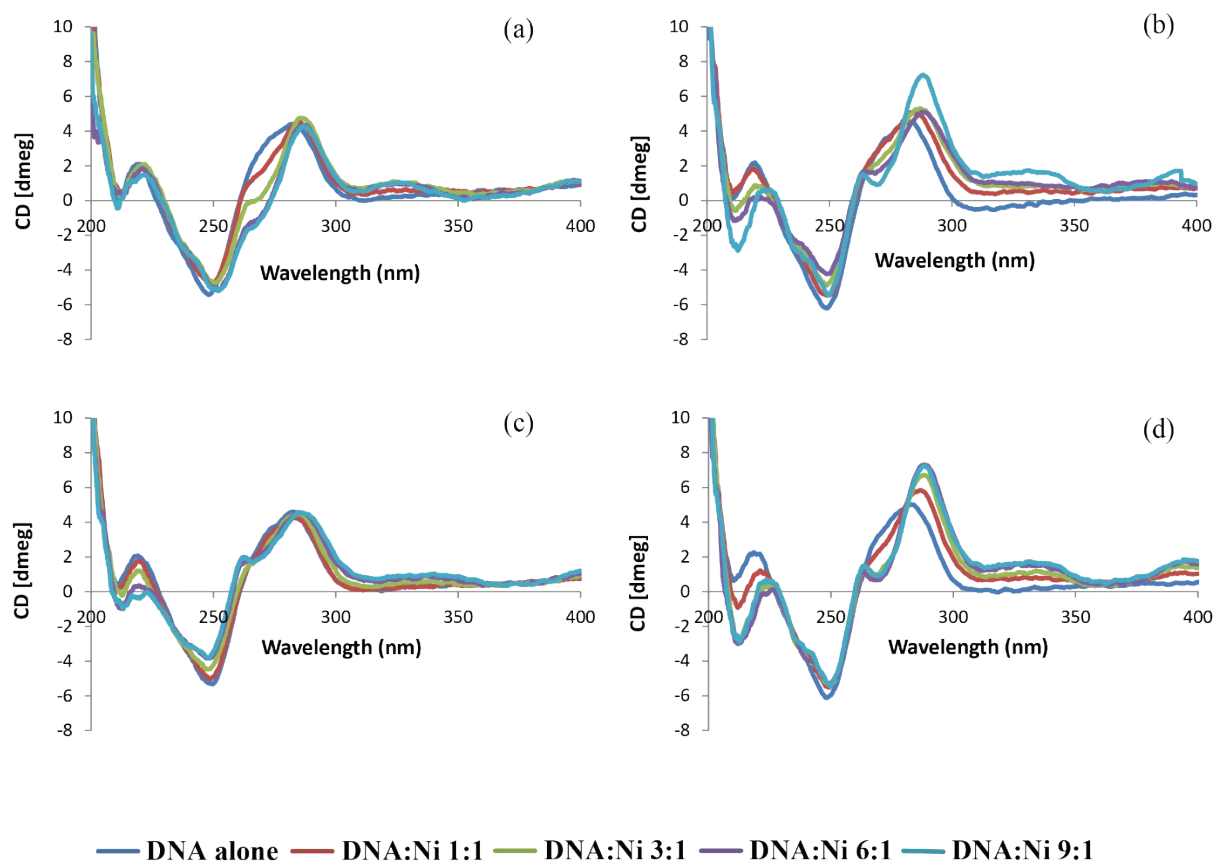

**Figure S6:** Circular dichroism spectra (200-400 nm) of solutions containing different ratios of nickel Schiff base complexes and D2: (a) D2 + (**7**); (b) D2 + (**10**); (c) D2 + (**13**) and (d) D2 + (**15**).

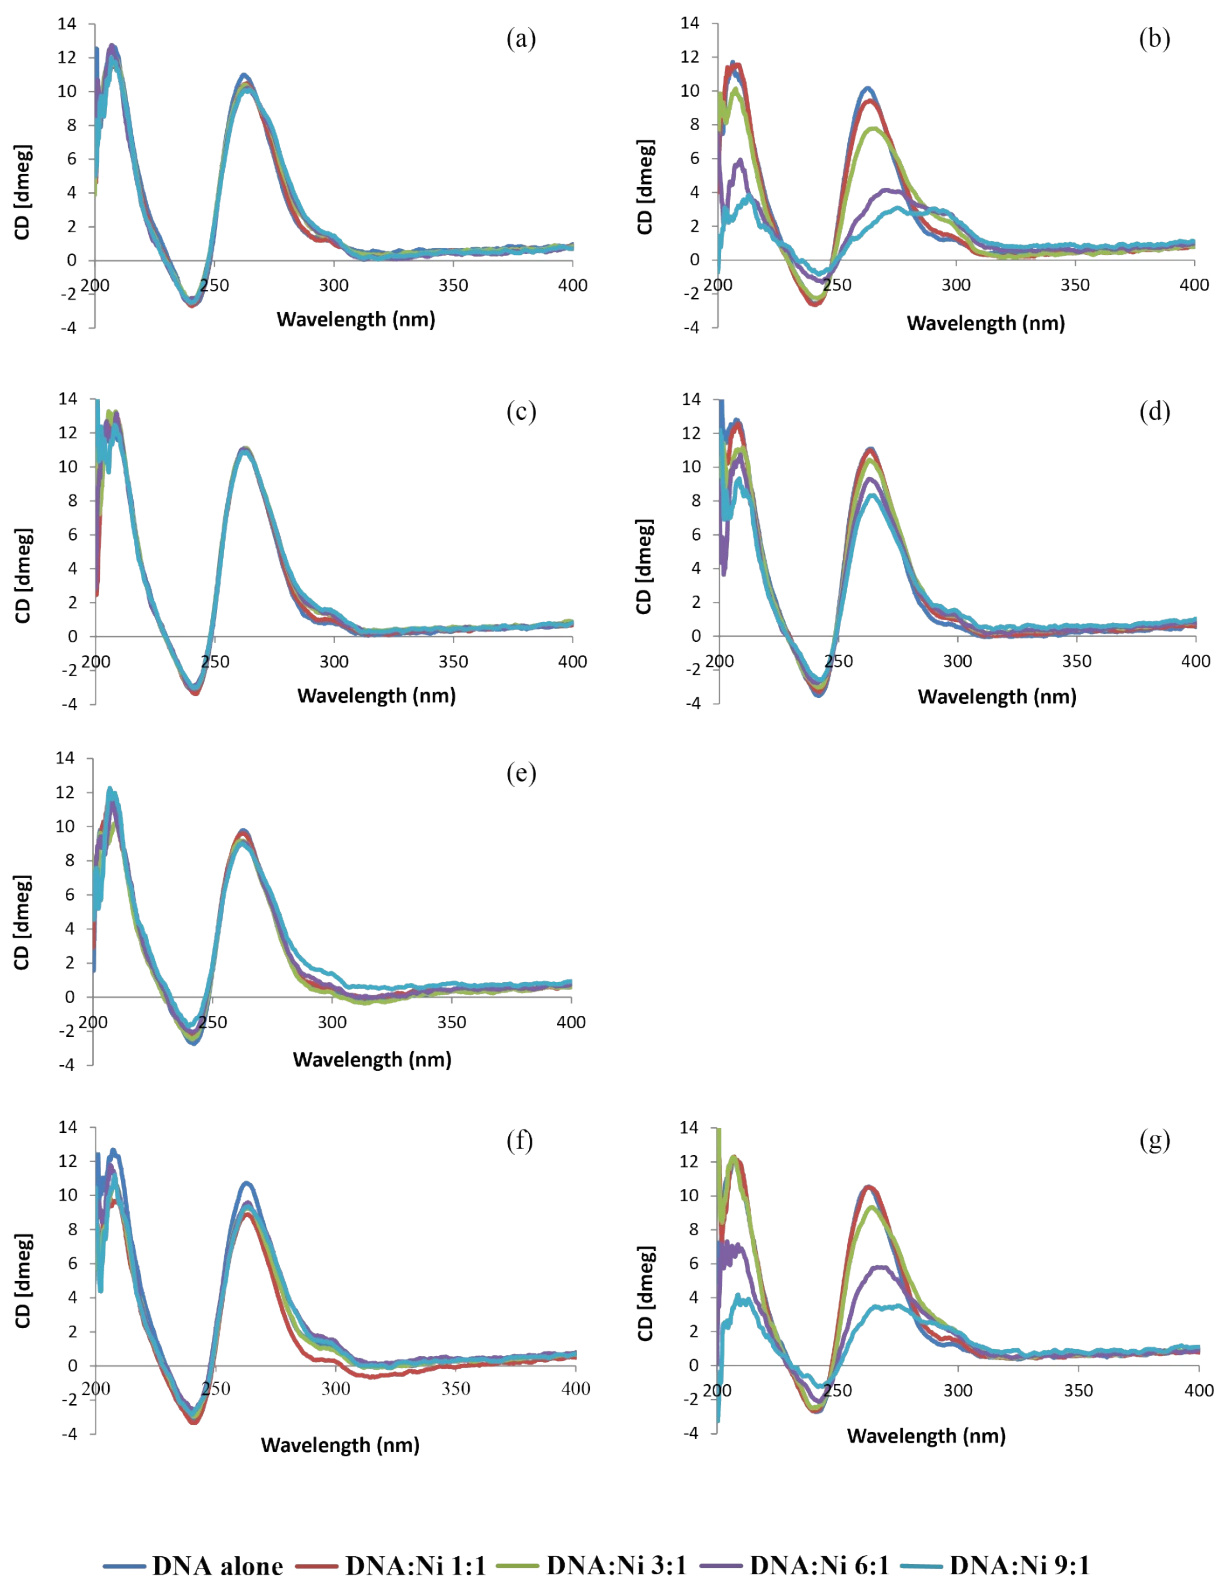

**Figure S7:** Circular dichroism spectra (200-400 nm) of solutions containing different ratios of nickel Schiff base complexes and parallel Q1+: (a) parallel Q1+ (**8**); (b) parallel Q1+ (**9**); (c) parallel Q1+ (**11**); (d) parallel Q1+ (**12**); (e) parallel Q1+ (**14**); (f) parallel Q1+ (**16**) and (g) parallel Q1+ (**17**).

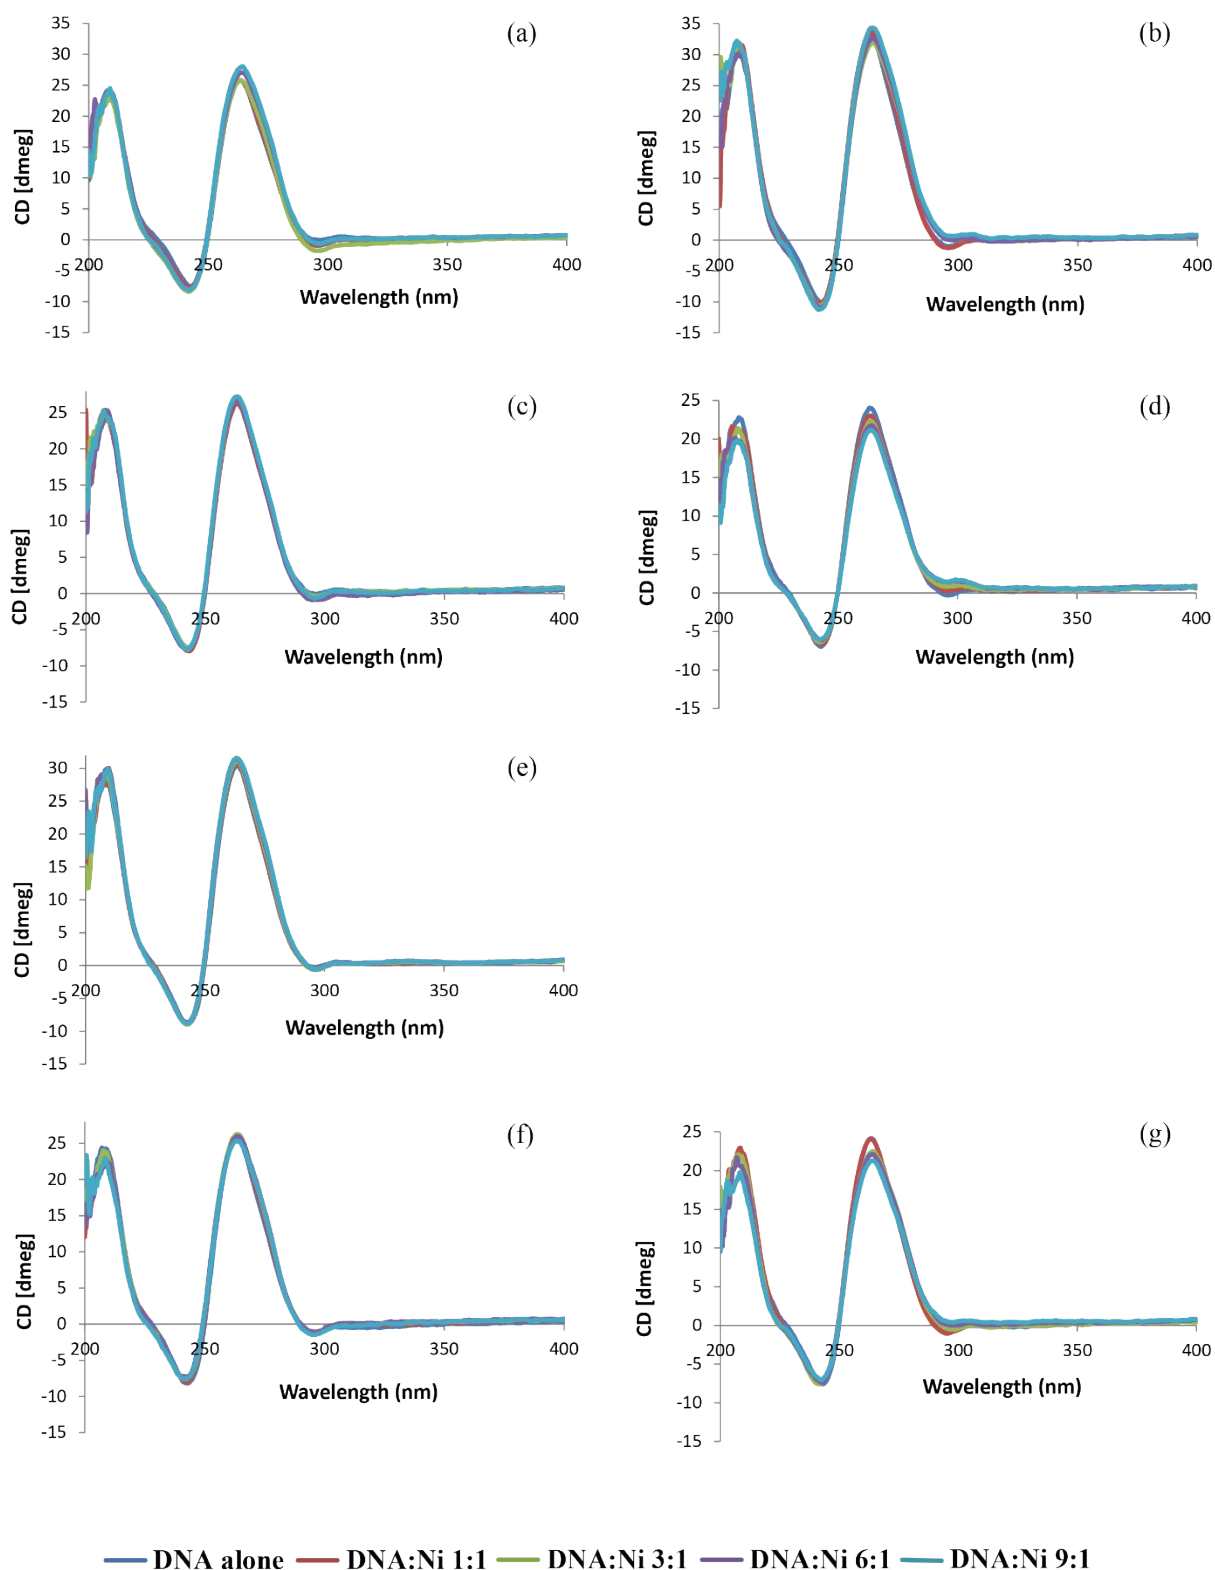

**Figure S8:** Circular dichroism spectra (200-400 nm) of solutions containing different ratios of nickel Schiff base complexes and parallel Q4: (a) parallel Q4+ (**8**); (b) parallel Q4+ (**9**); (c) parallel Q4+ (**11**); (d) parallel Q4+ (**12**); (e) parallel Q4+ (**14**); (f) parallel Q4+ (**16**) and (g) parallel Q4+ (**17**).

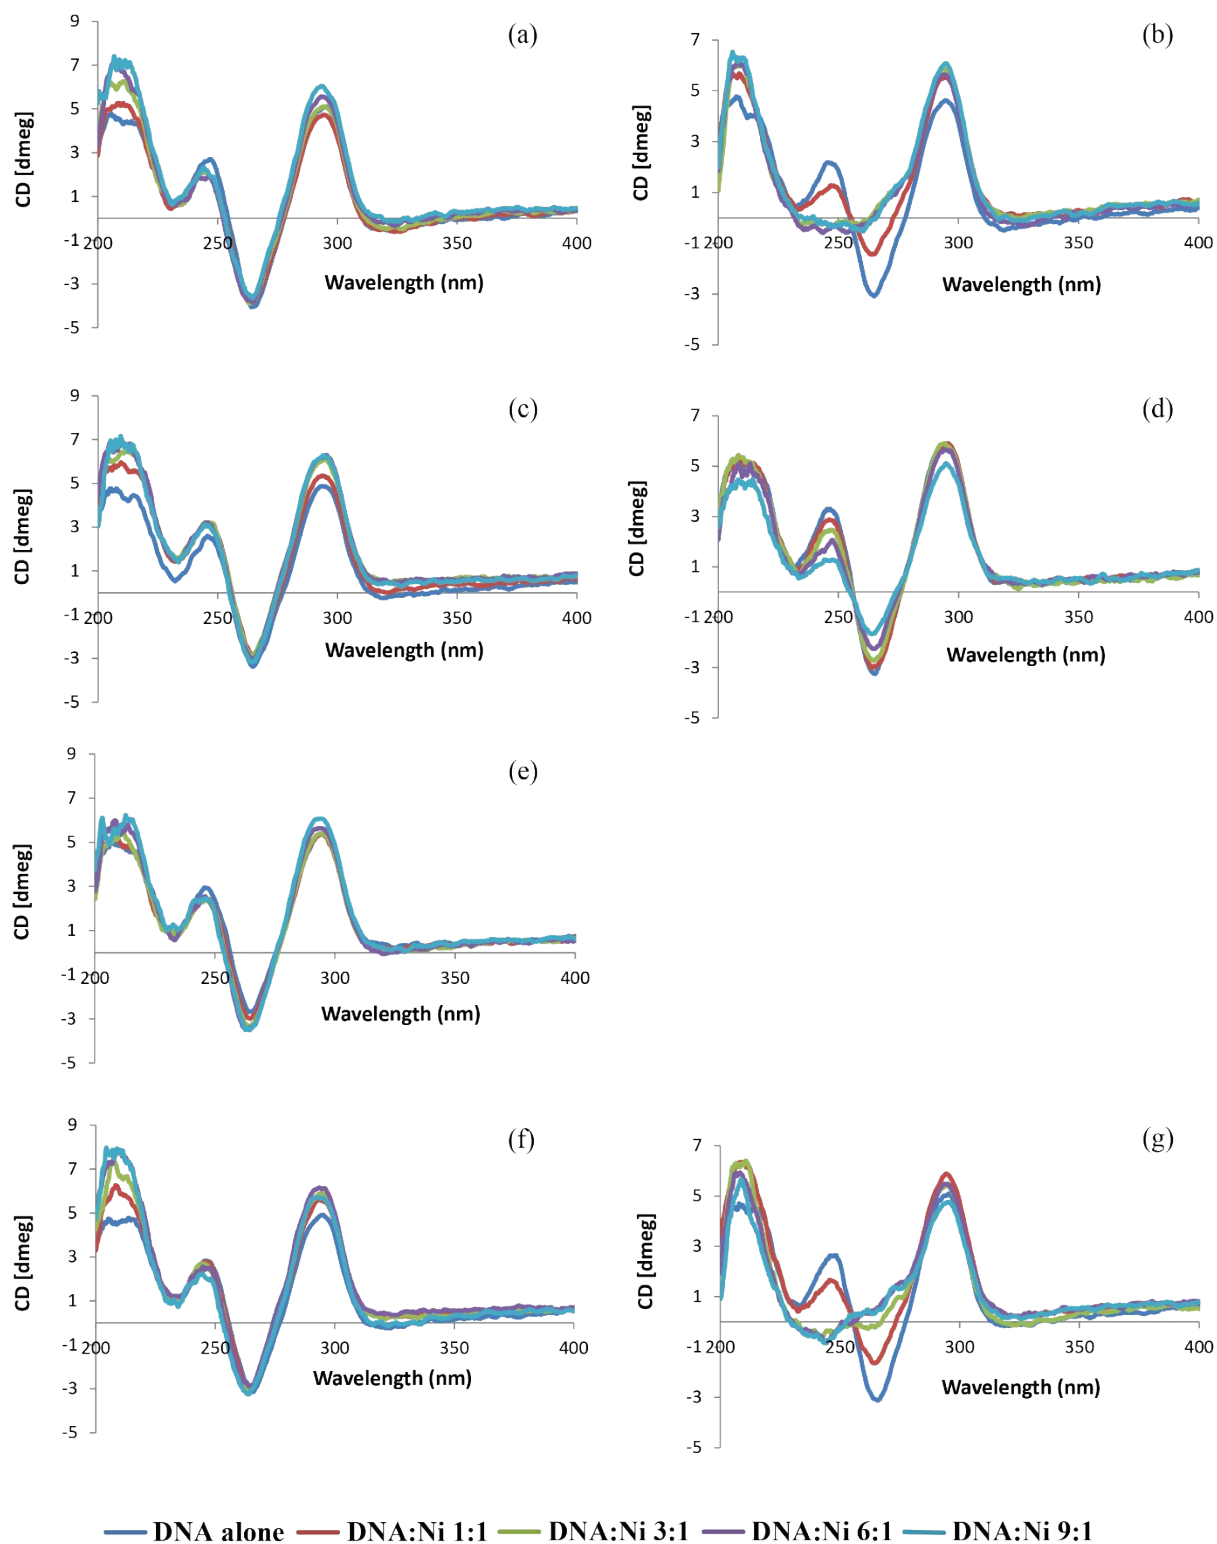

**Figure S9:** Circular dichroism spectra (200-400 nm) of solutions containing different ratios of nickel Schiff base complexes and anti-parallel Q1: (a) anti-parallel Q1+ (**8**); (b) anti-parallel Q1+ (**9**); (c) anti-parallel Q1+ (**11**); (d) anti-parallel Q1+ (**12**); (e) anti-parallel Q1+ (**14**); (f) anti-parallel Q1+ (**16**) and (g) anti-parallel Q1+ (**17**).

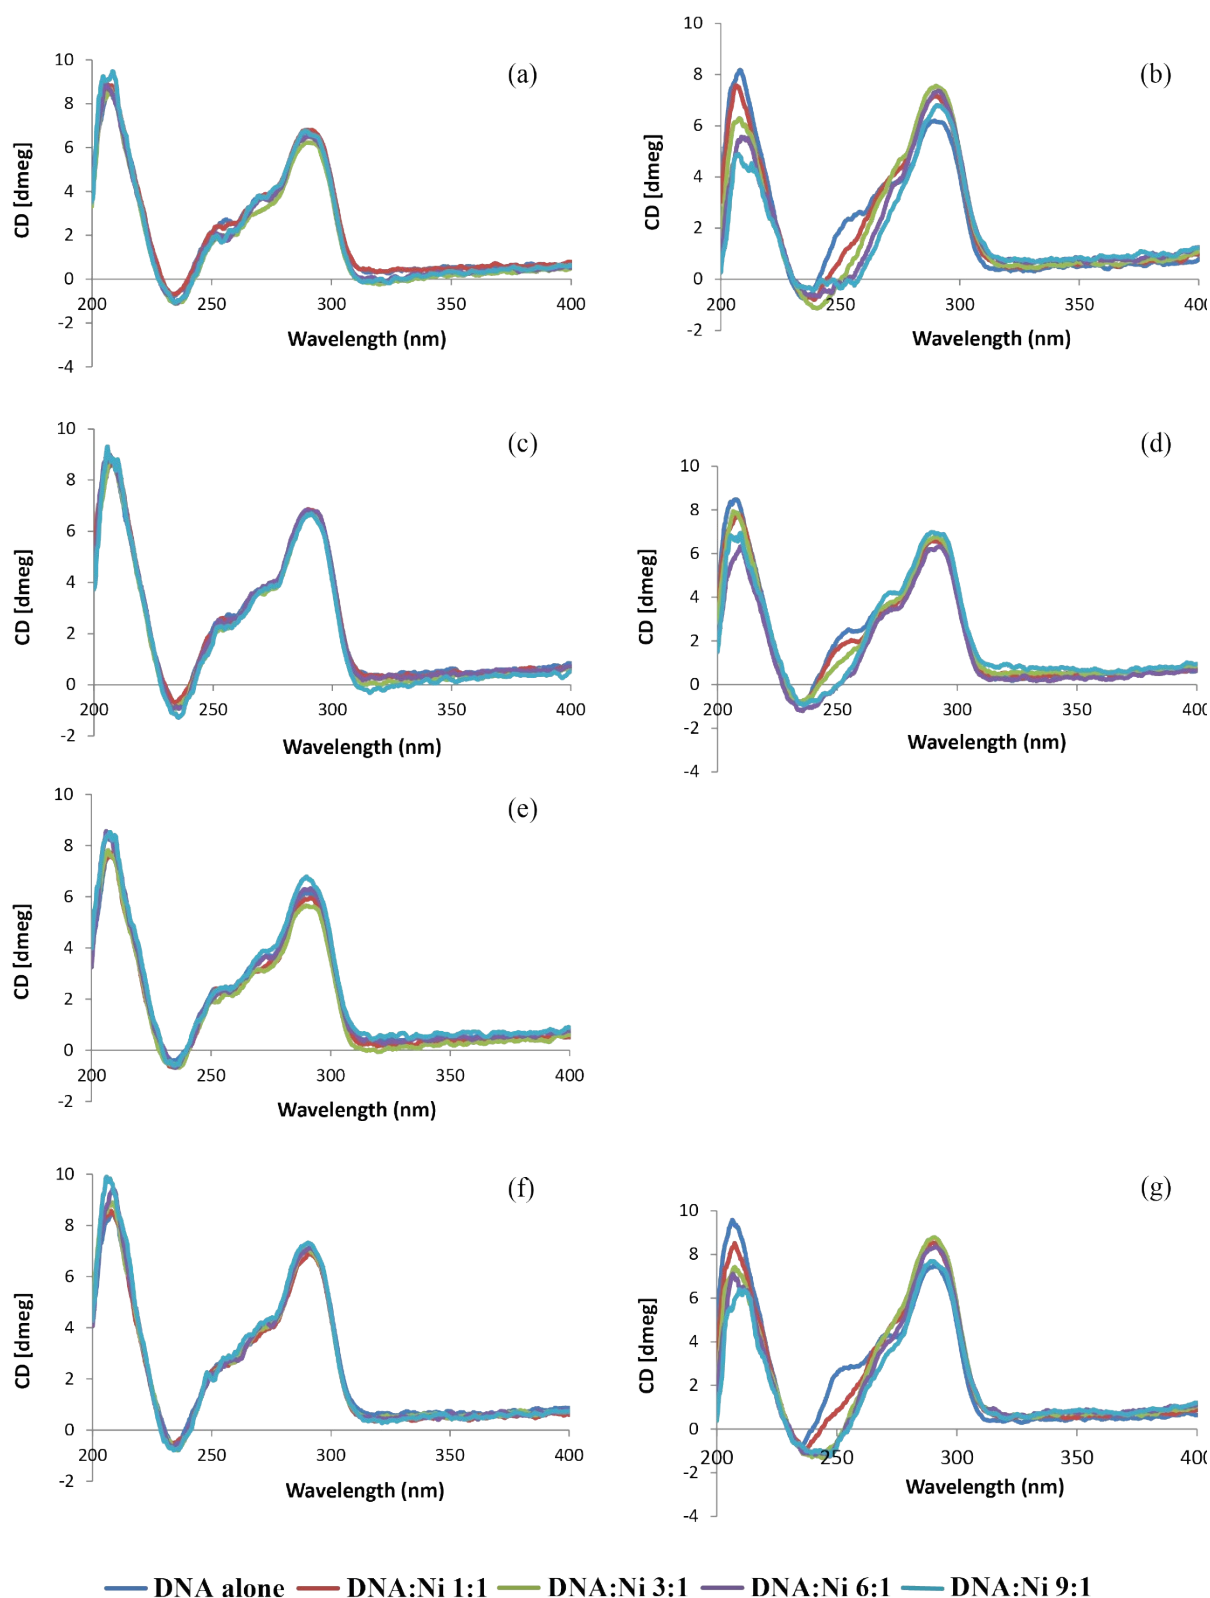

**Figure S10:** Circular dichroism spectra (200-400 nm) of solutions containing different ratios of nickel Schiff base complexes and hybrid Q1: (a) hybrid Q1+ (**8**); (b) hybrid Q1+ (**9**); (c) hybrid Q1+ (**11**); (d) hybrid Q1+ (**12**); (e) hybrid Q1+ (**14**); (f) hybrid Q1+ (**16**) and (g) hybrid Q1+ (**17**).

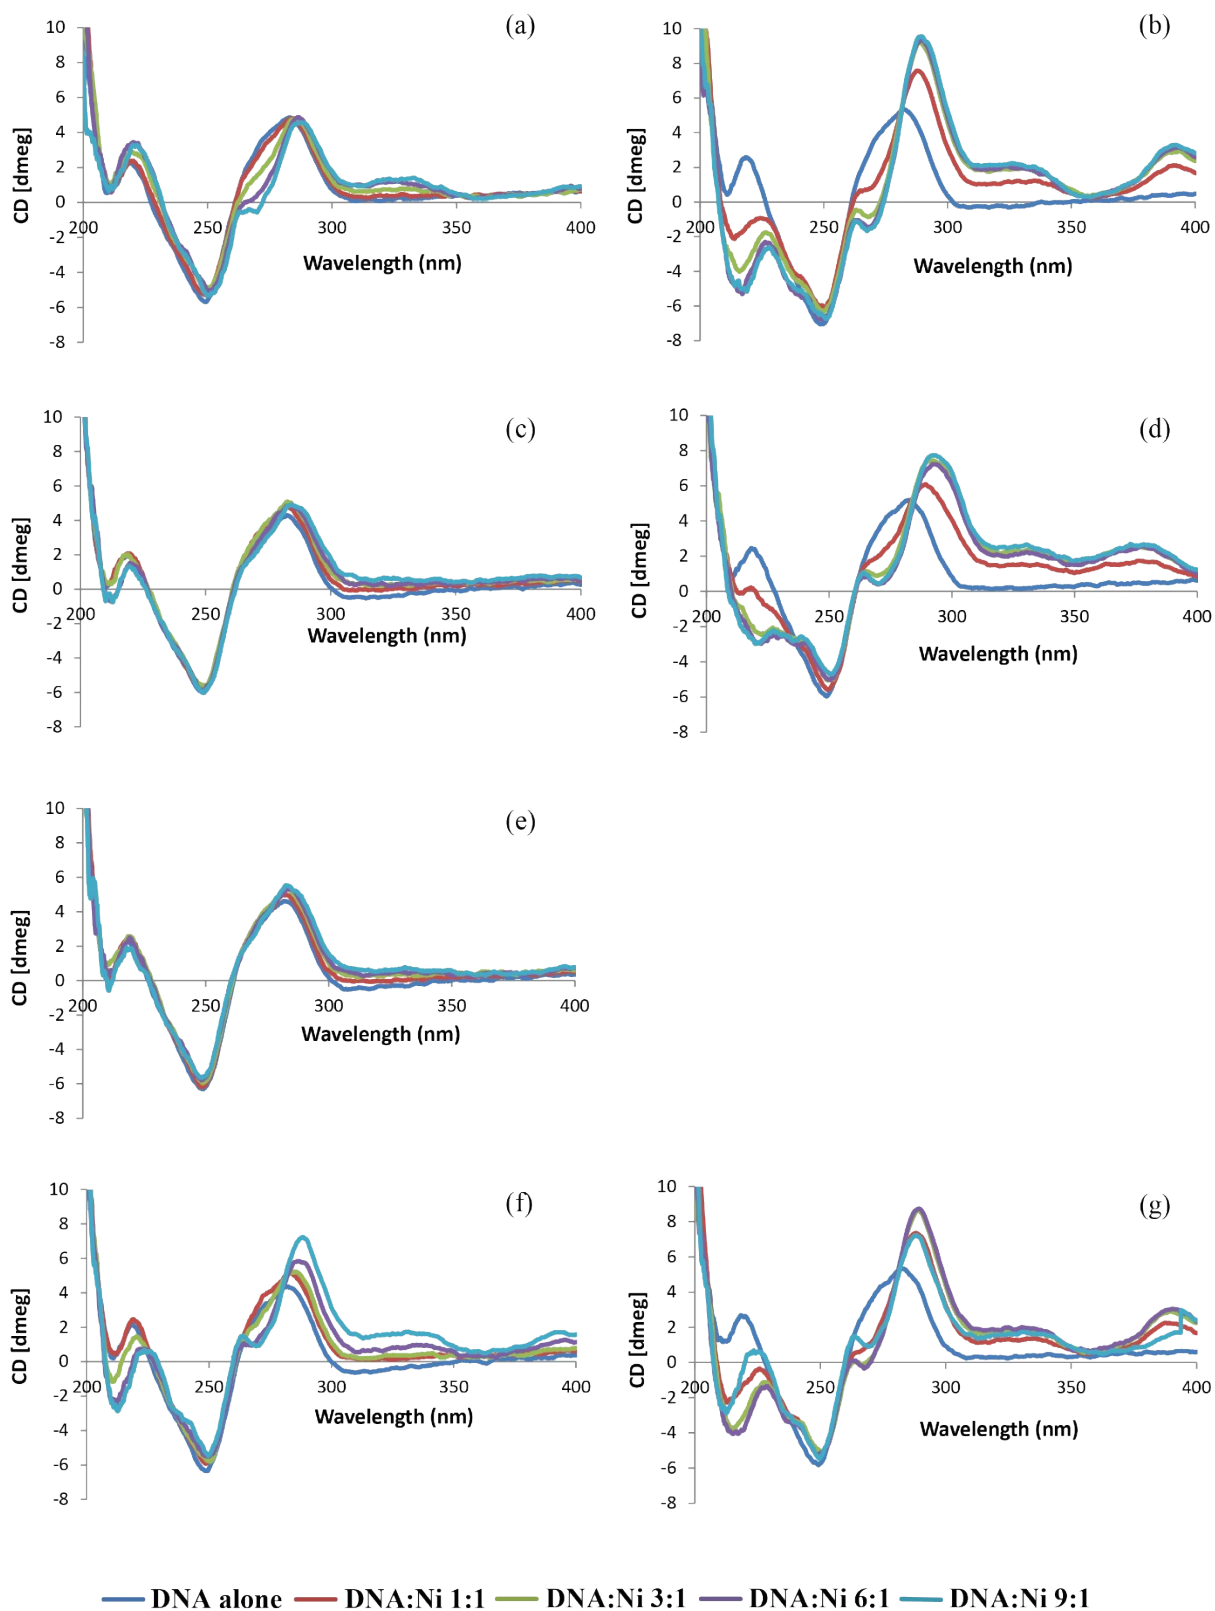

**Figure S11:** Circular dichroism spectra (200-400 nm) of solutions containing different ratios of nickel Schiff base complexes and D2: (a) D2 + (**8**); (b) D2 + (**9**); (c) D2 + (**11**); (d) D2 + (**12**); (e) D2 + (**14**); (f) D2 + (**16**) and (g) D2 + (**17**).

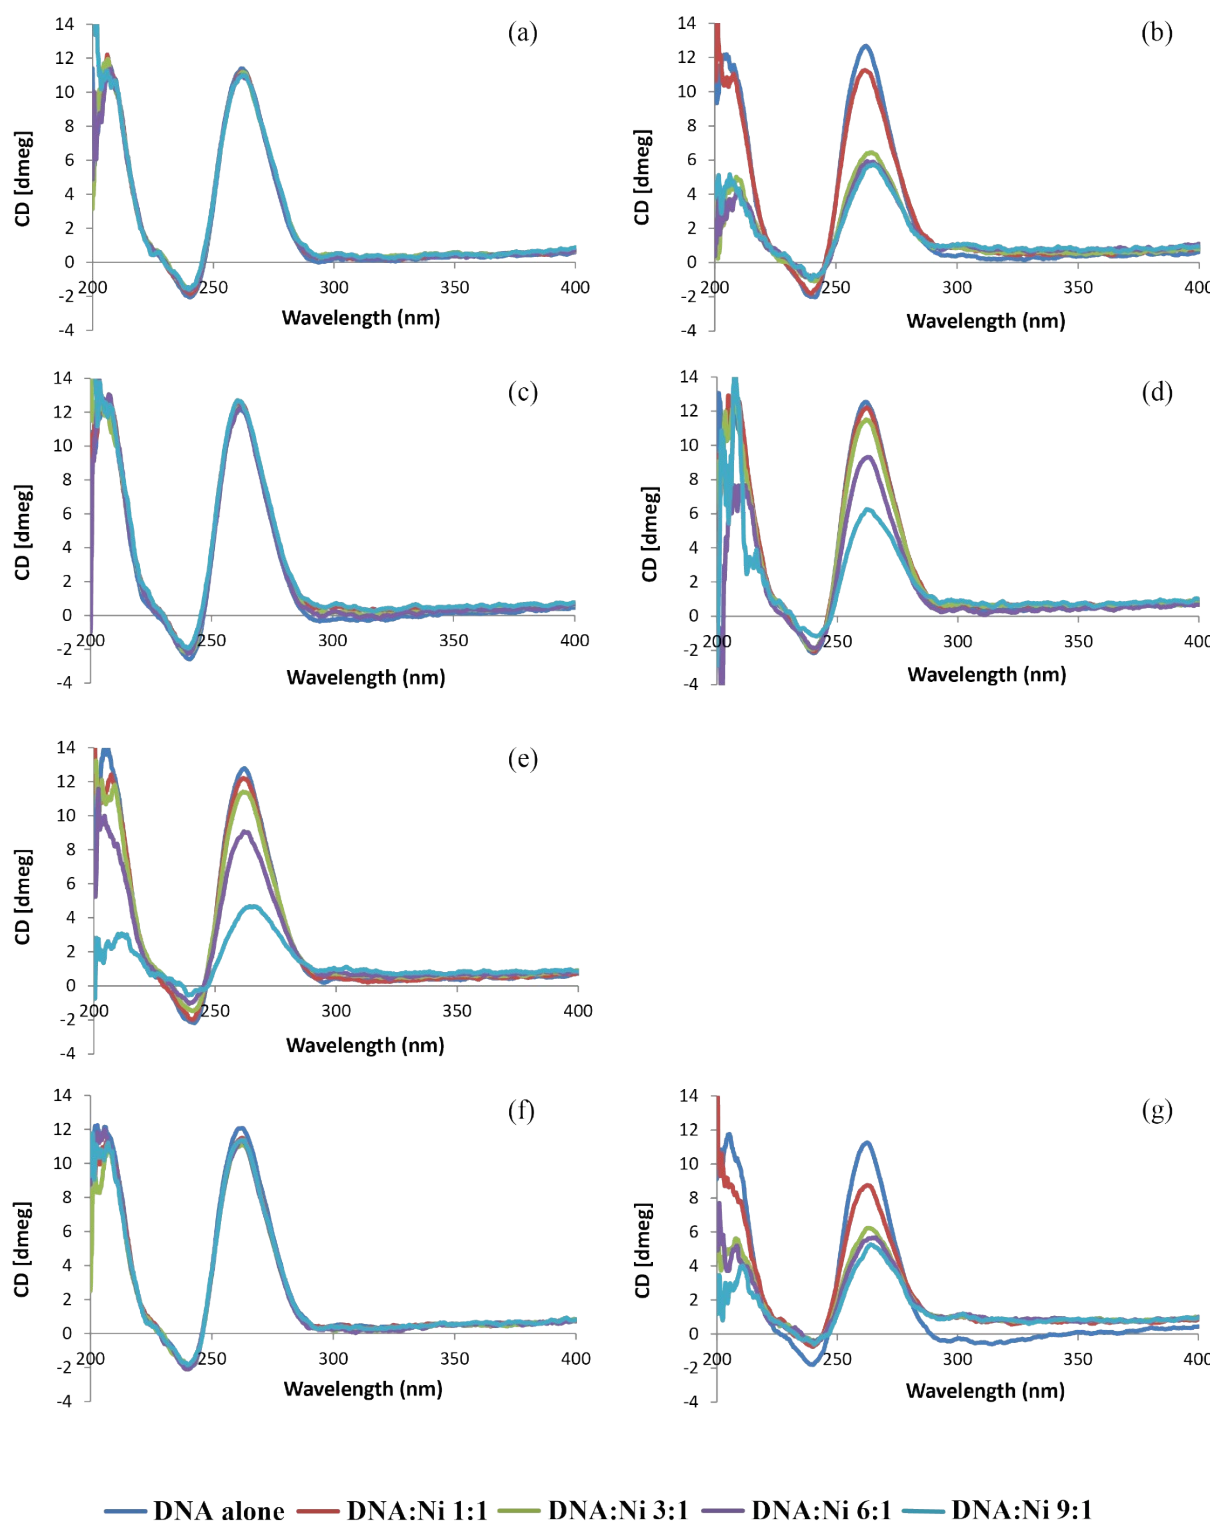

**Figure S12:** Circular dichroism spectra (200-400 nm) of solutions containing different ratios of nickel Schiff base complexes and C-KIT1: (a) C-KIT1+ (**8**); (b) C-KIT1+ (**9**); (c) C-KIT1+ (**11**); (d) C-KIT1+ (**12**); (e) C-KIT1+ (**14**); (f) C-KIT1+ (**16**) and (g) C-KIT1+ (**17**).



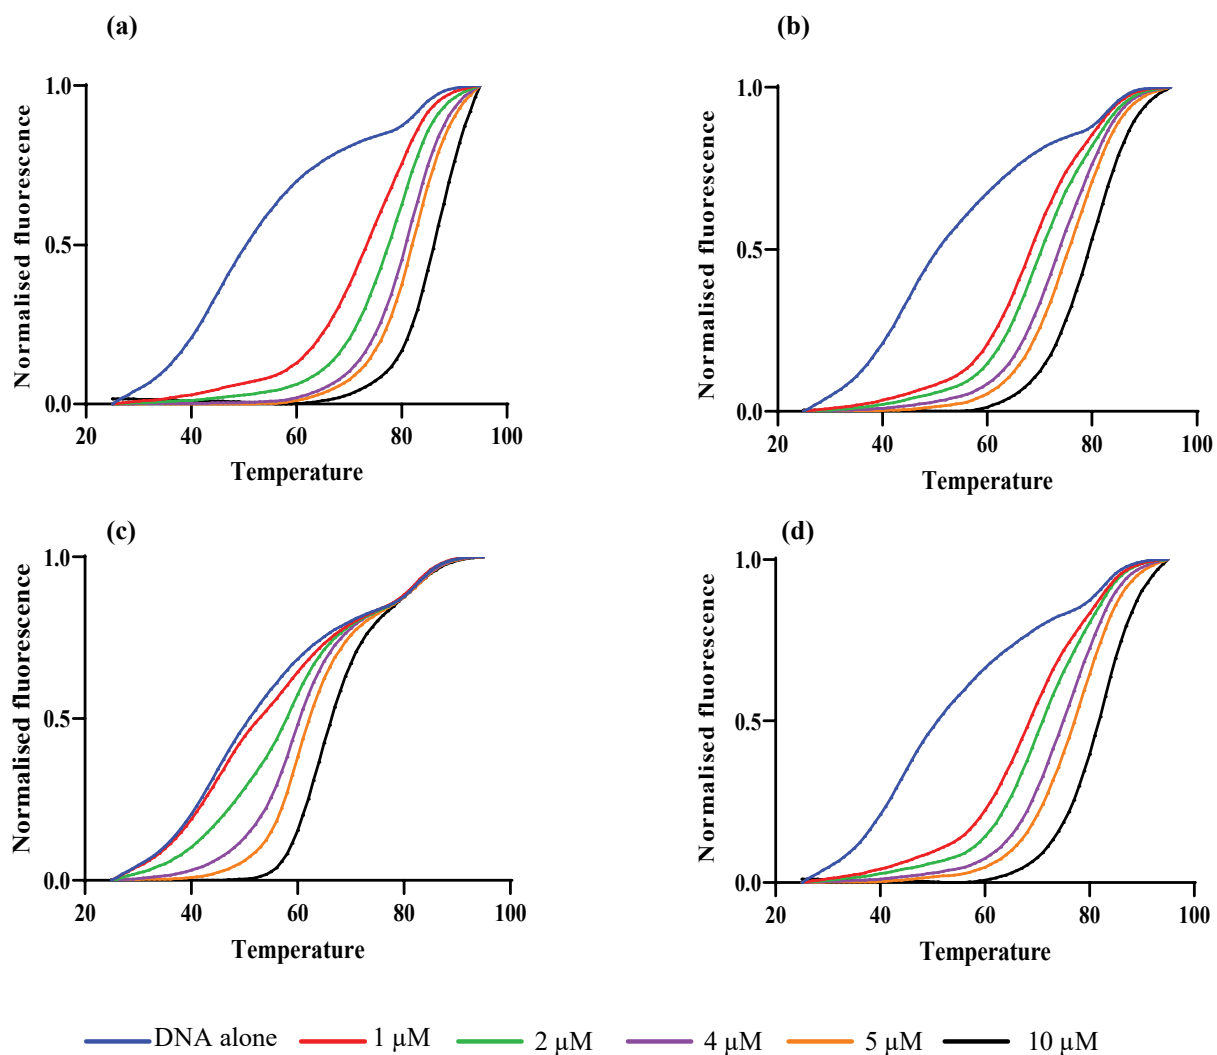

**Figure S13:** Results obtained from FRET melting assays performed using anti-parallel F21T and increasing concentrations of nickel Schiff base complexes. (a) (**7**); (b) (**10**); (c) (**13**) and (d) (**15**).

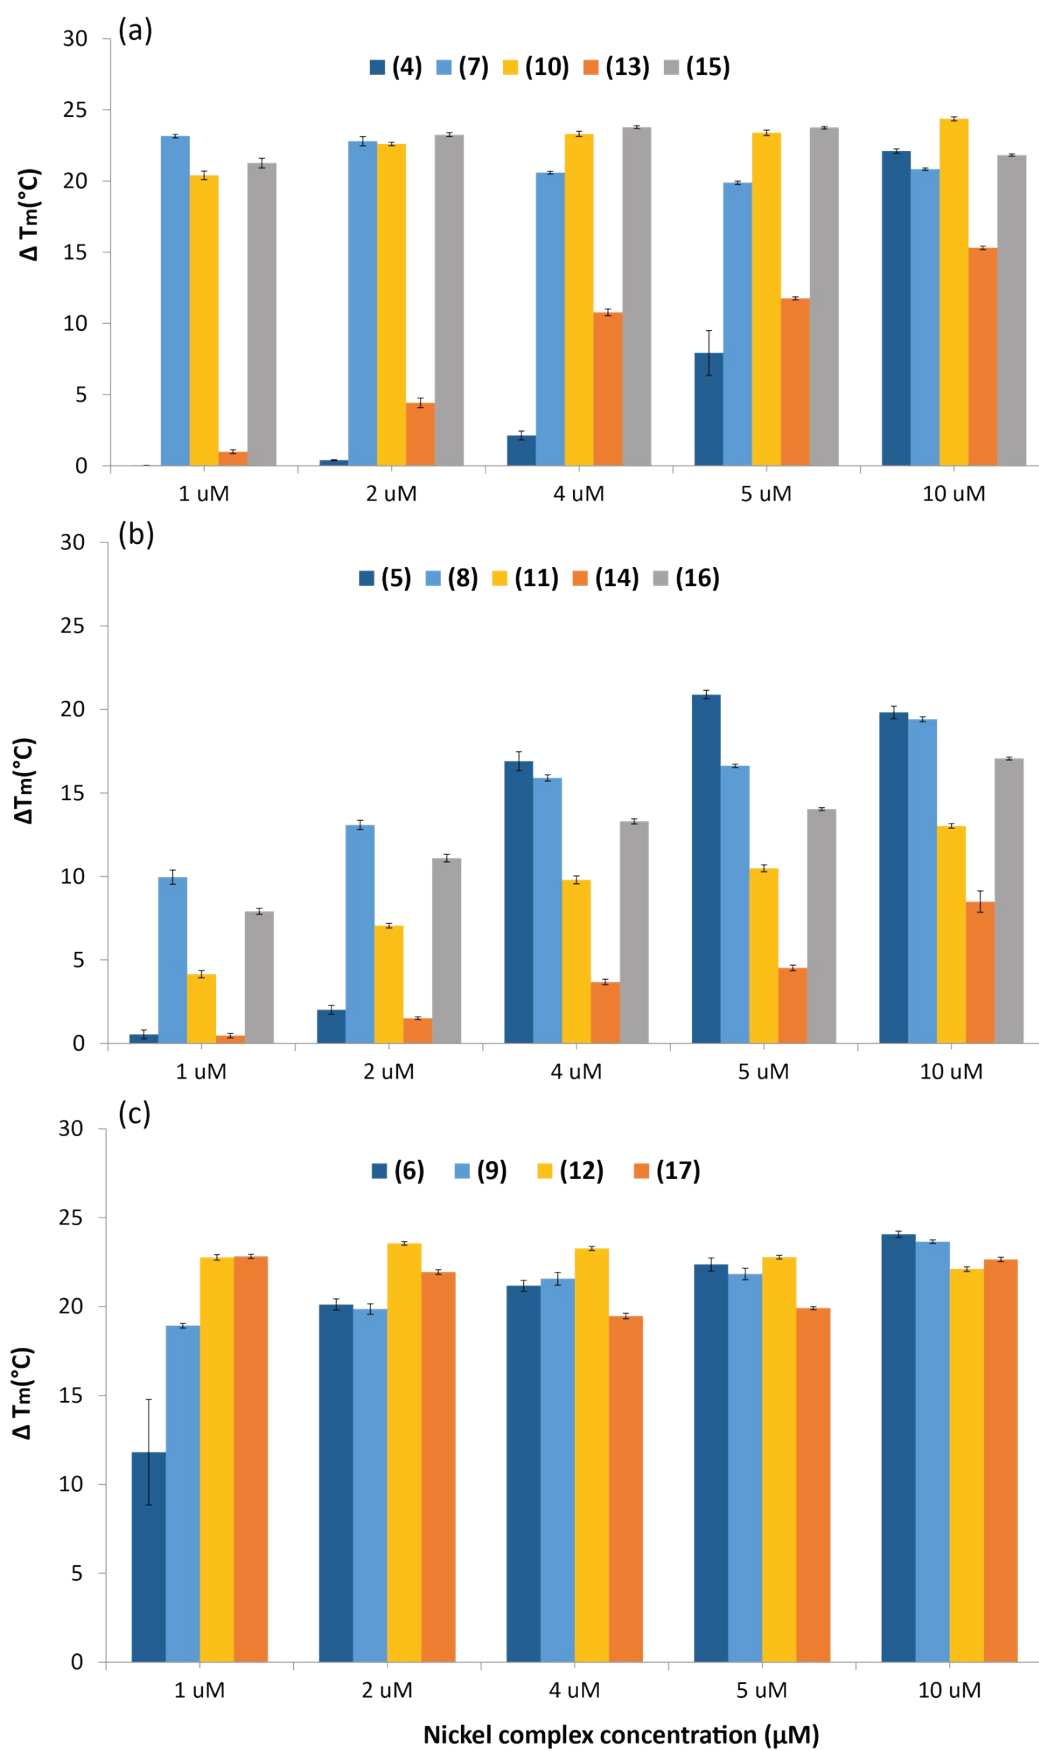

**Figure S14:** Effect of nickel complexes on  $\Delta T_m$  for solutions containing 0.20  $\mu\text{M}$  hybrid F21T.

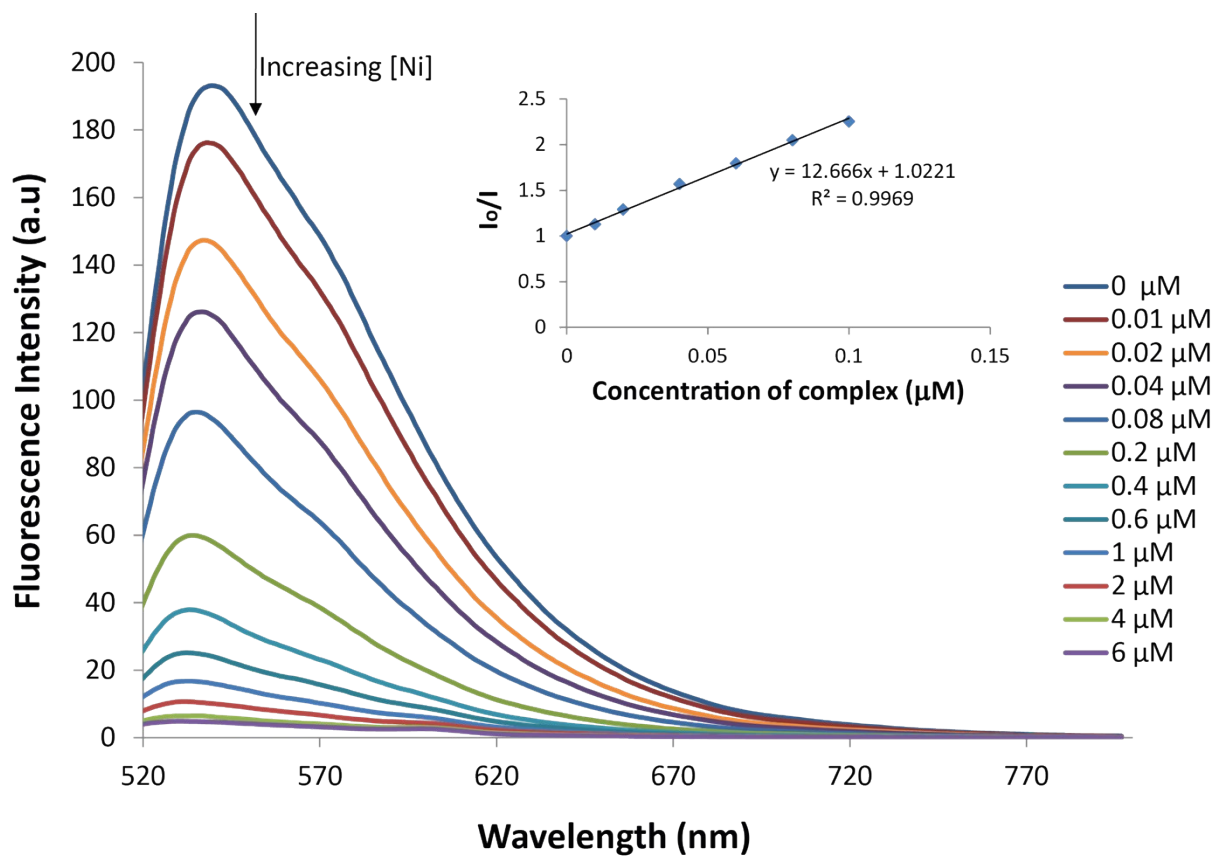

**Figure S15:** Results from an FID assay performed by adding increasing amounts of (9) to a solution containing thiazole orange and parallel Q1. The inset shows a Stern-Volmer plot derived from the data, which was then used to determine the  $DC_{50}$  for the nickel complex.

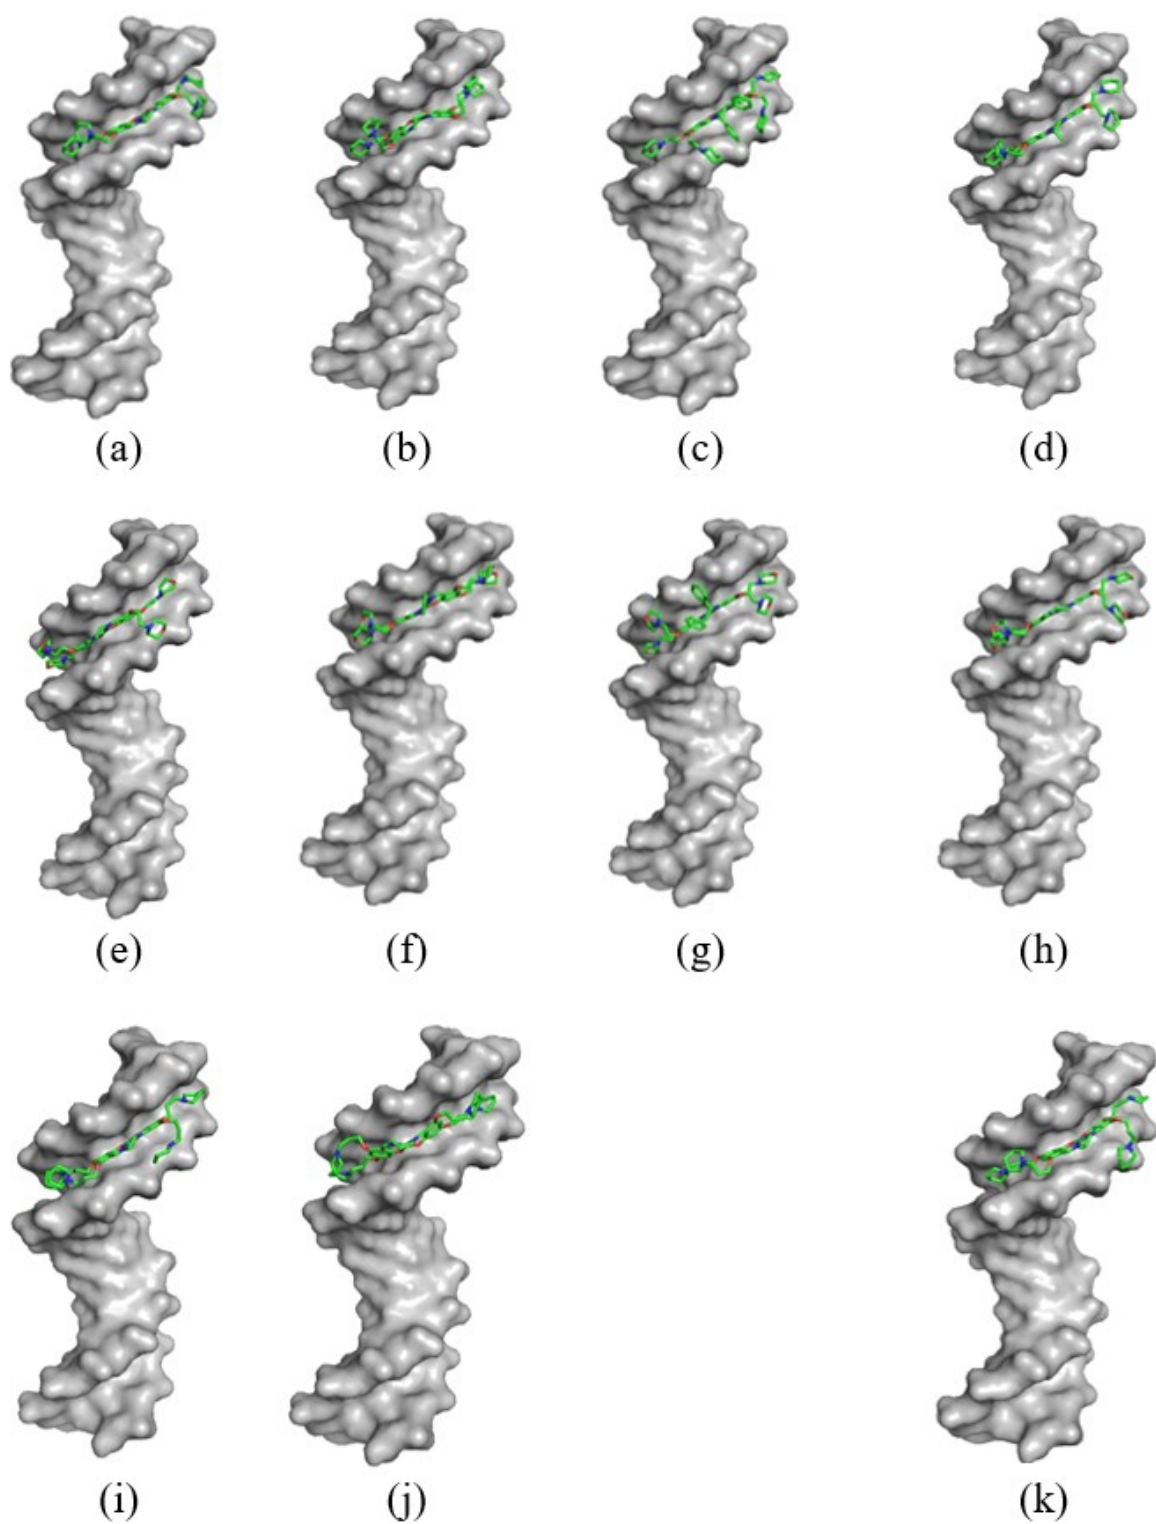

**Figure S16:** Results from molecular docking experiments performed using the dsDNA 1KBD and different nickel complexes: (a) **(7)**; (b) **(10)**; (c) **(13)**; (d) **(15)**; (e) **(8)**; (f) **(11)**; (g) **(14)**; (h) **(16)**; (i) **(9)**; (j) **(12)** and (k) **(17)**.

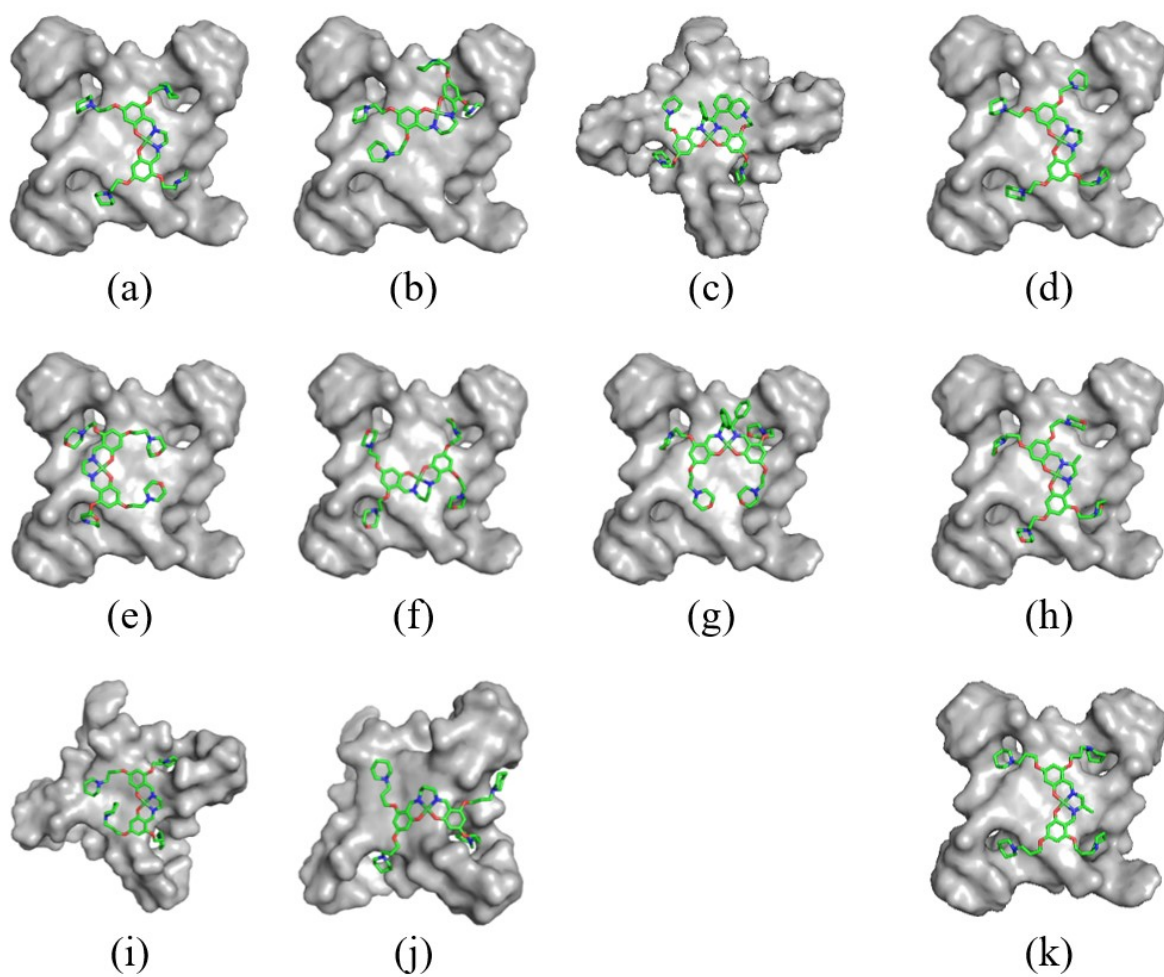

**Figure S17:** Results from molecular docking experiments performed using the unimolecular G-quadruplex 1KF1 and different nickel complexes: (a) **(7)**; (b) **(10)**; (c) **(13)**; (d) **(15)**; (e) **(8)**; (f) **(11)**; (g) **(14)**; (h) **(16)**; (i) **(9)**; (j) **(12)** and (k) **(17)**.

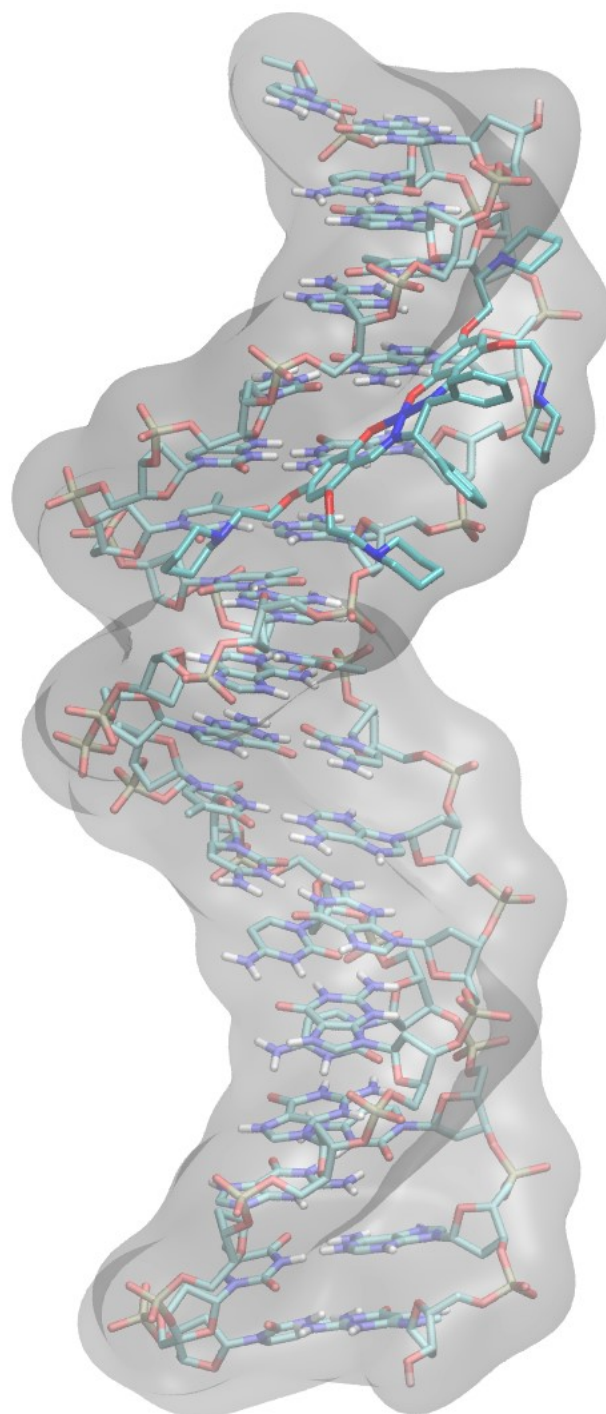

**Figure S18(a):** High resolution image obtained from molecular docking study involving Ni(**13**) and 1KBD.

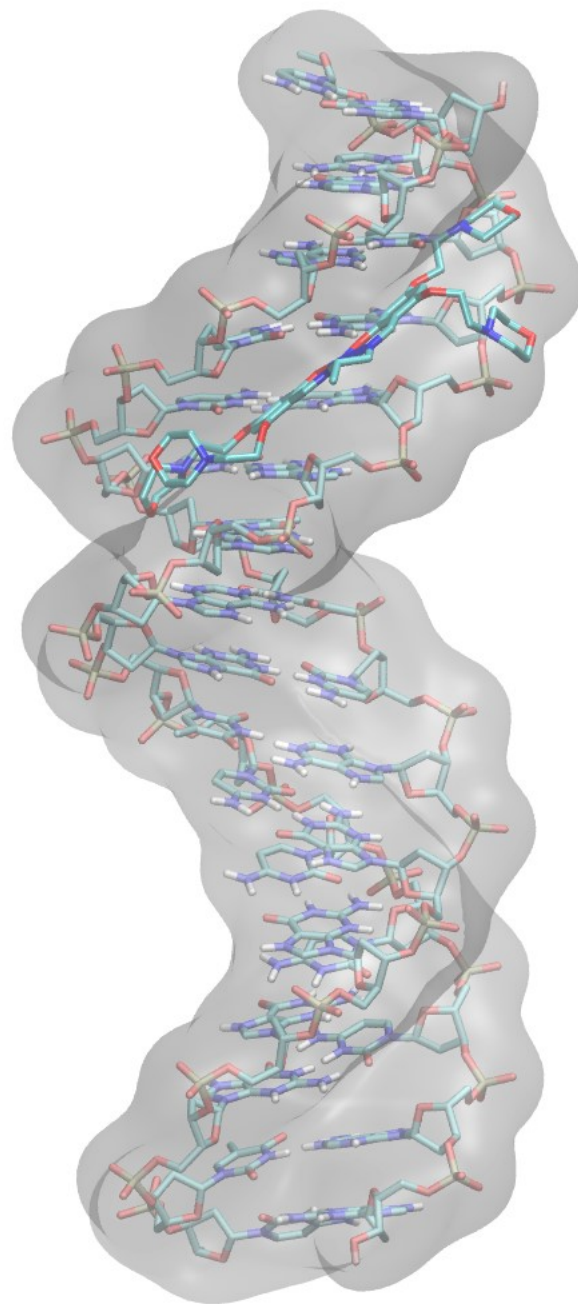

**Figure S18(b):** High resolution image obtained from molecular docking study involving Ni(16) and 1KBD.

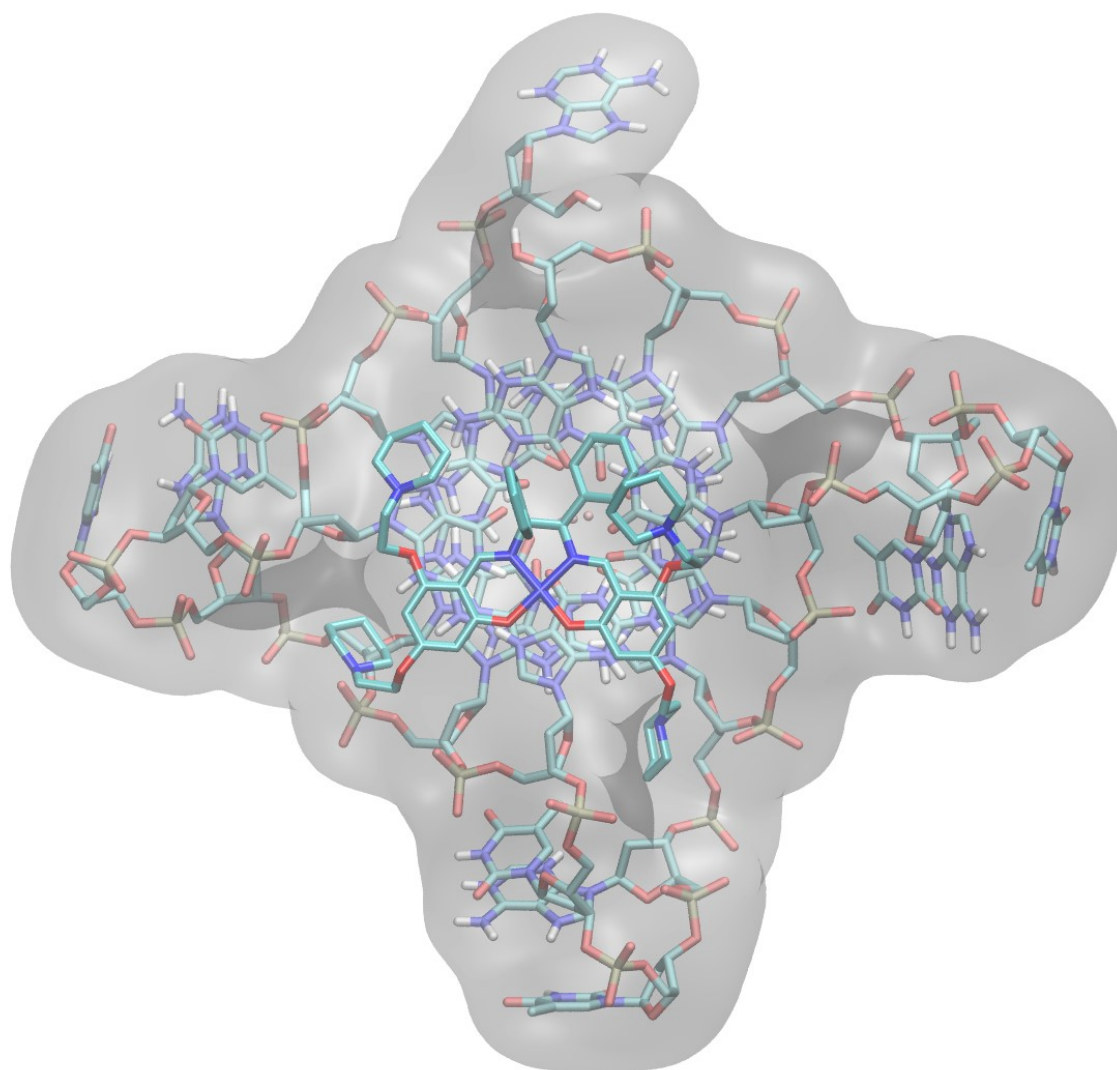

**Figure S18(c):** High resolution image obtained from molecular docking study involving Ni(**13**) and 1KF1. Orientation 1.



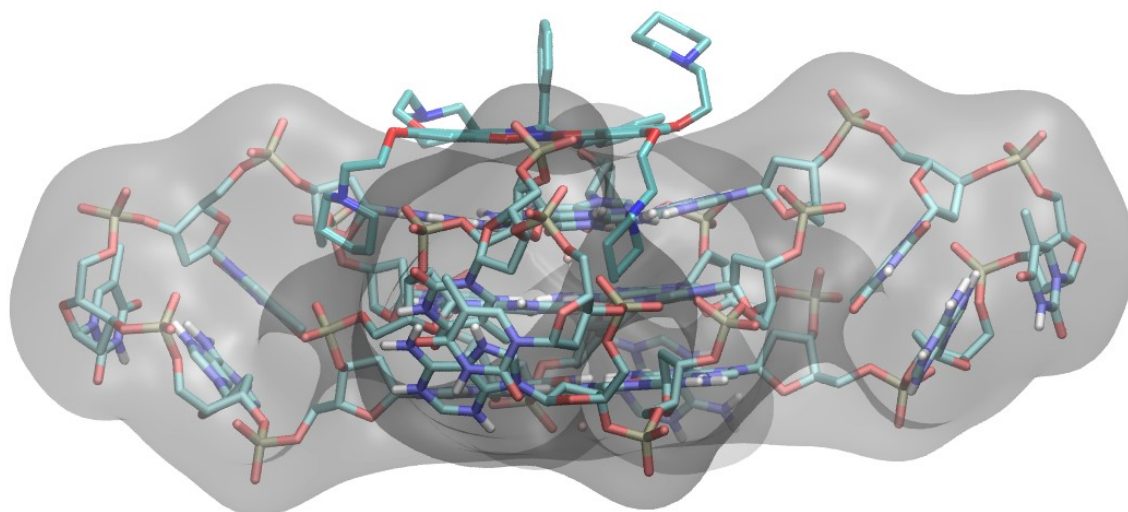

**Figure S18(d):** High resolution image obtained from molecular docking study involving Ni(13) and 1KF1. Orientation 2.

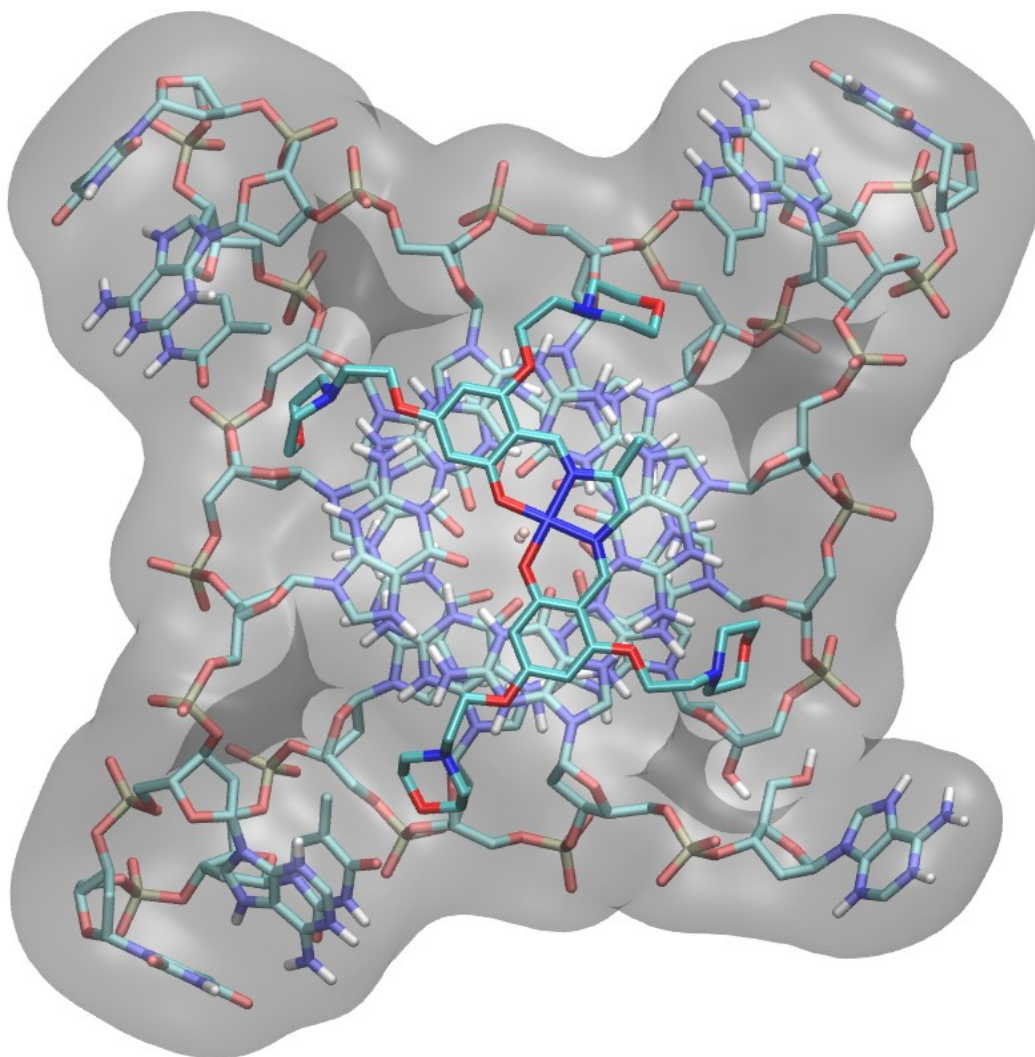

**Figure S18(e):** High resolution image obtained from molecular docking study involving Ni(16) and 1KF1. Orientation 1.

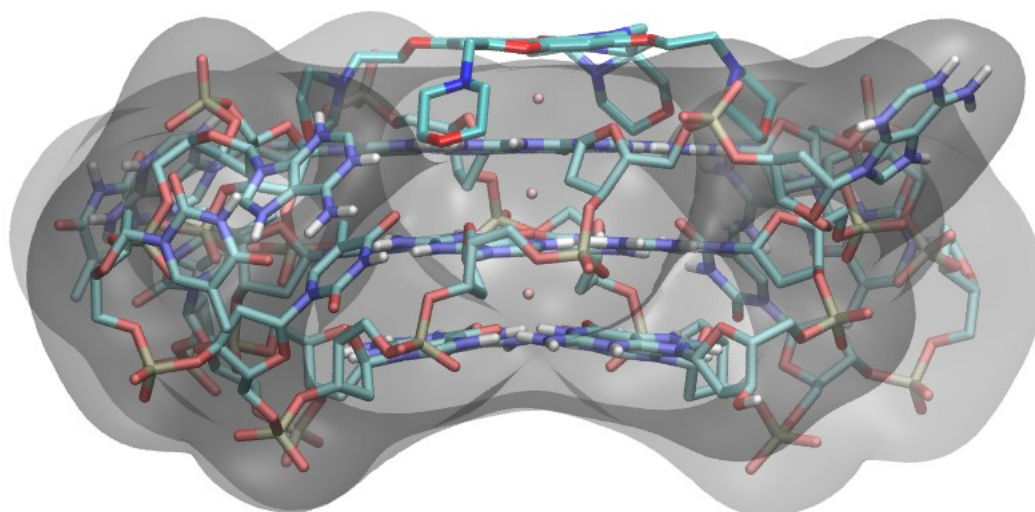

**Figure S18(f):** High resolution image obtained from molecular docking study involving Ni(**16**) and 1KF1. Orientation 2.

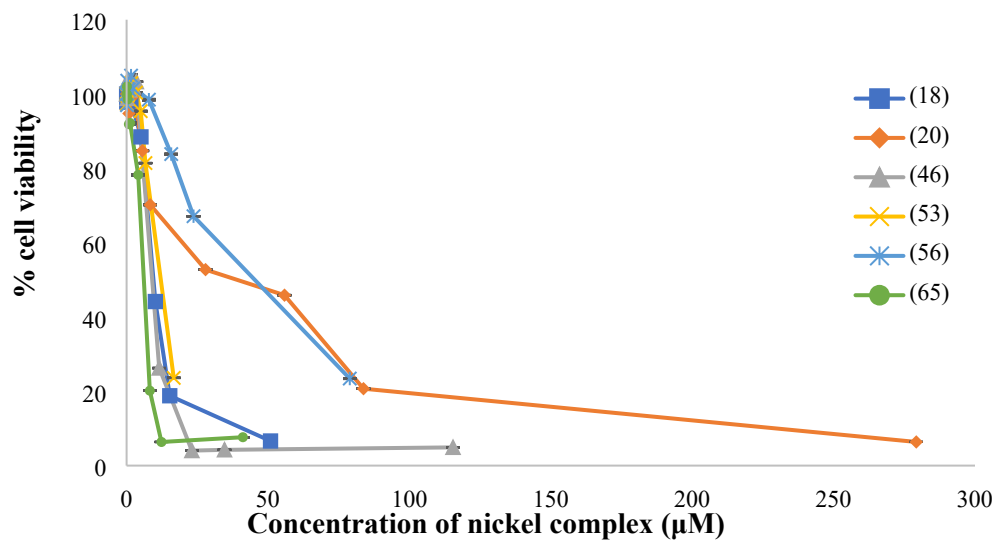

**Figure S19:** Concentration-response curves obtained from 24 h MTT assays performed using V79 Chinese hamster lung cancer cells and different nickel complexes.

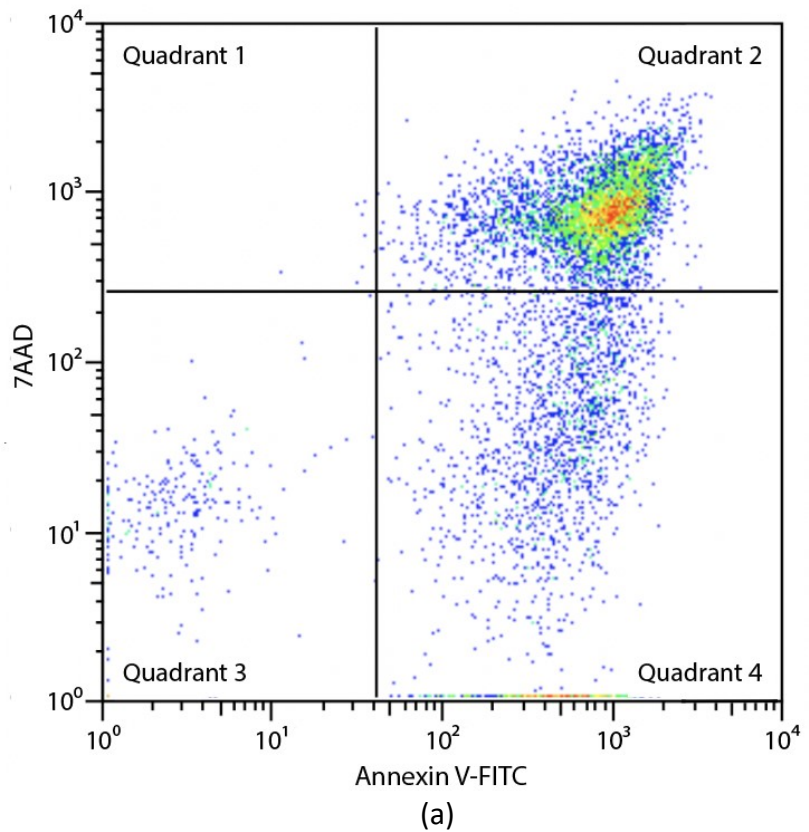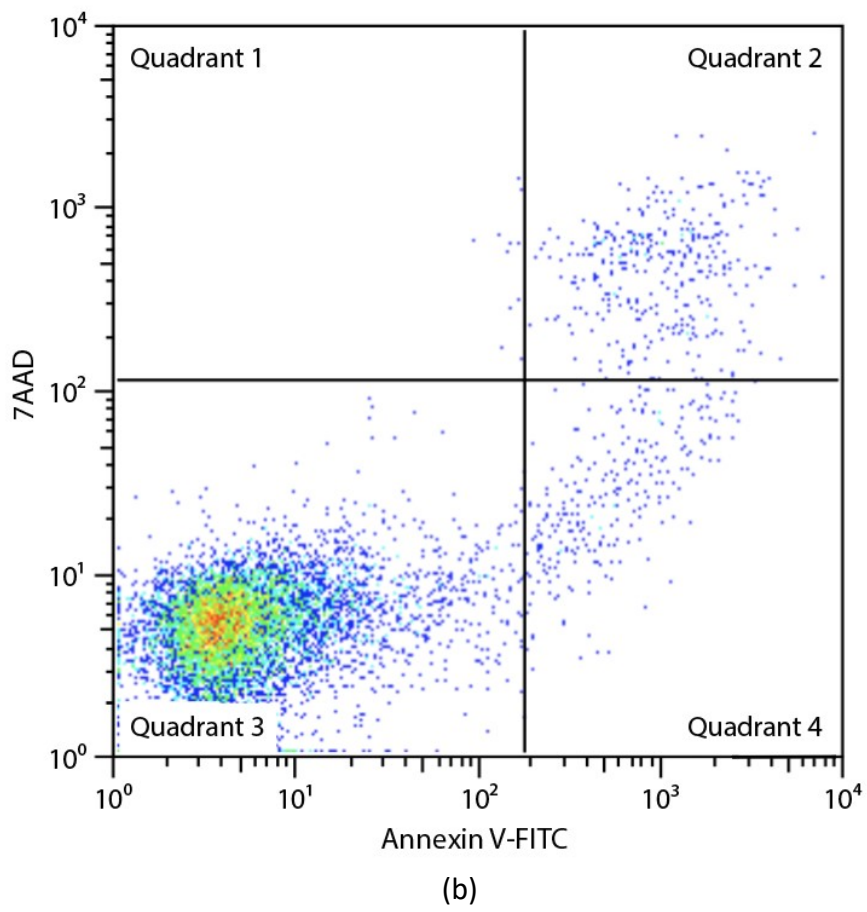

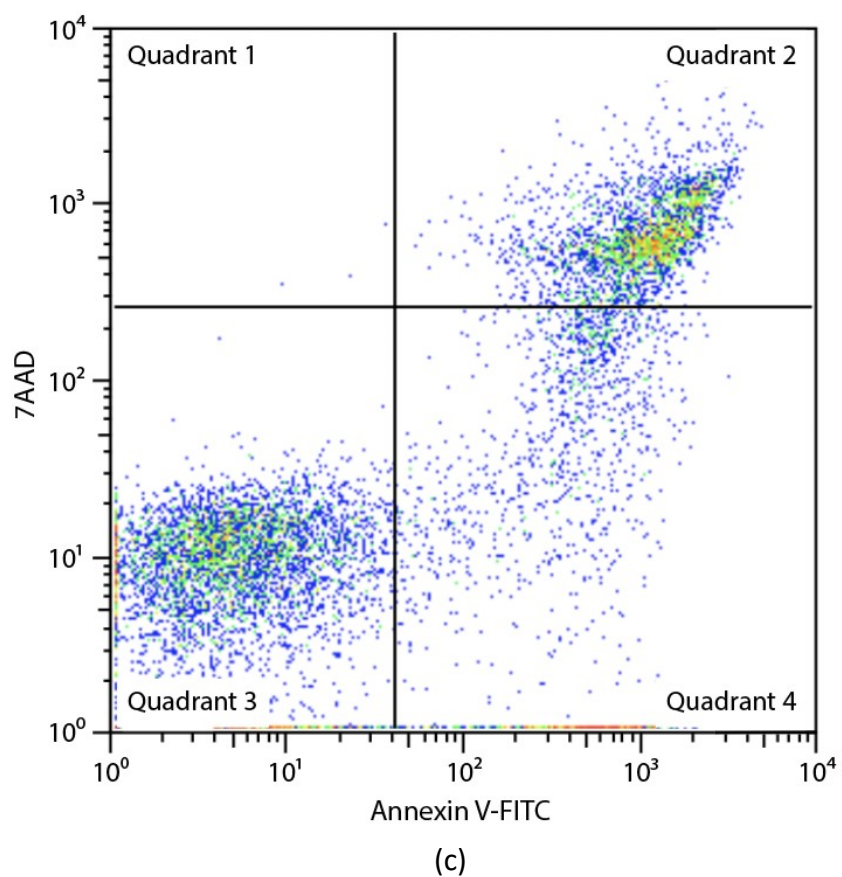

**Figure S20:** Results obtained from flow cytometry experiments performed by exposing THP-1 leukemia cells to 10.0  $\mu\text{M}$  nickel complexes for 24 h. The experiments were conducted using Annexin V-FITC and 7AAD fluorescent stains and by collecting 10,000 events. (a) (18); (b) (19) and (c) (21).

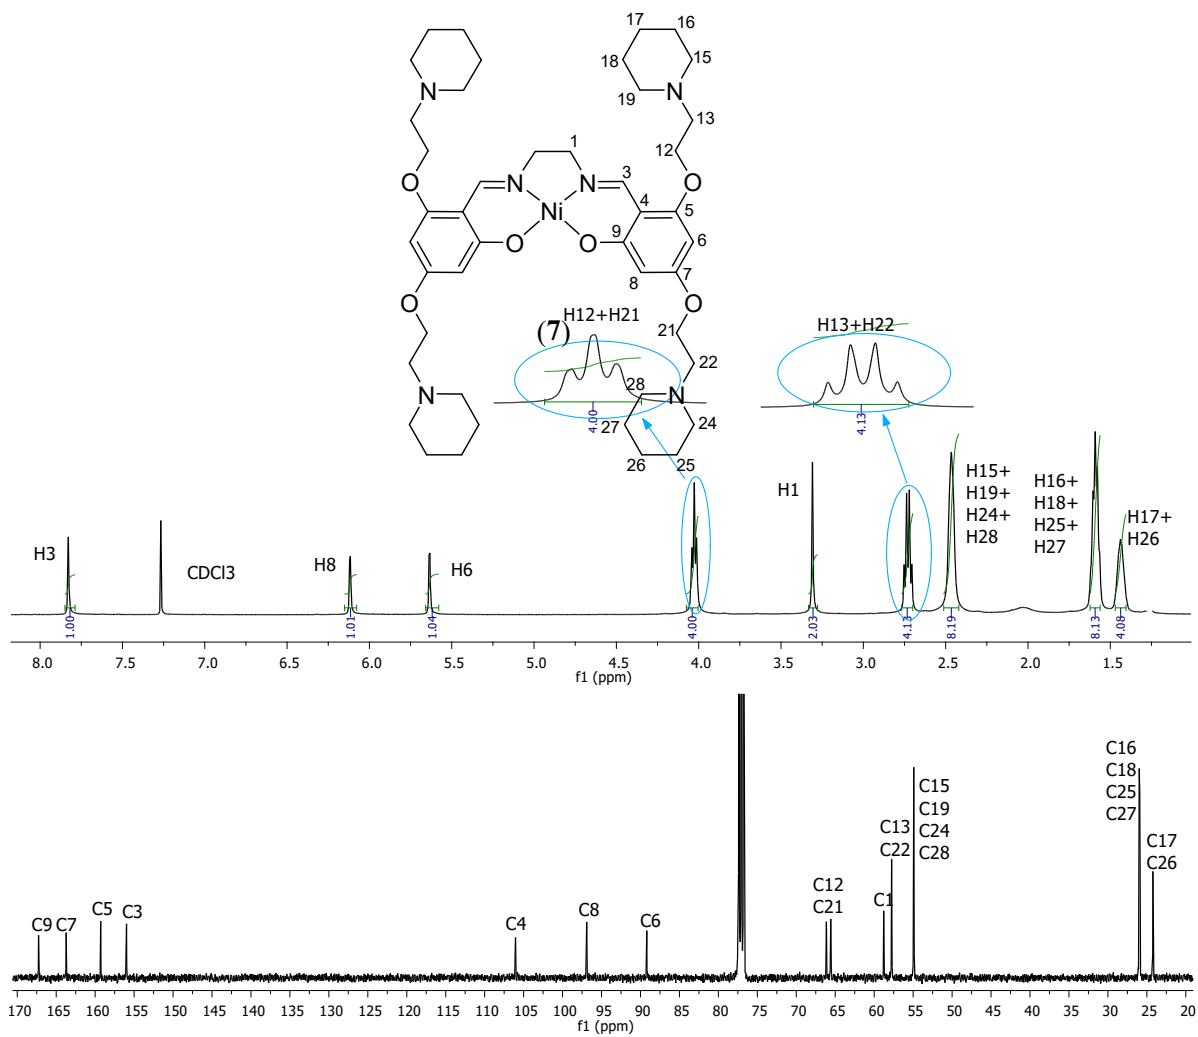

**Figure S21:**  $^1\text{H}$  and  $^{13}\text{C}$  NMR spectra of (7), with expansions of some signals, for clarity.

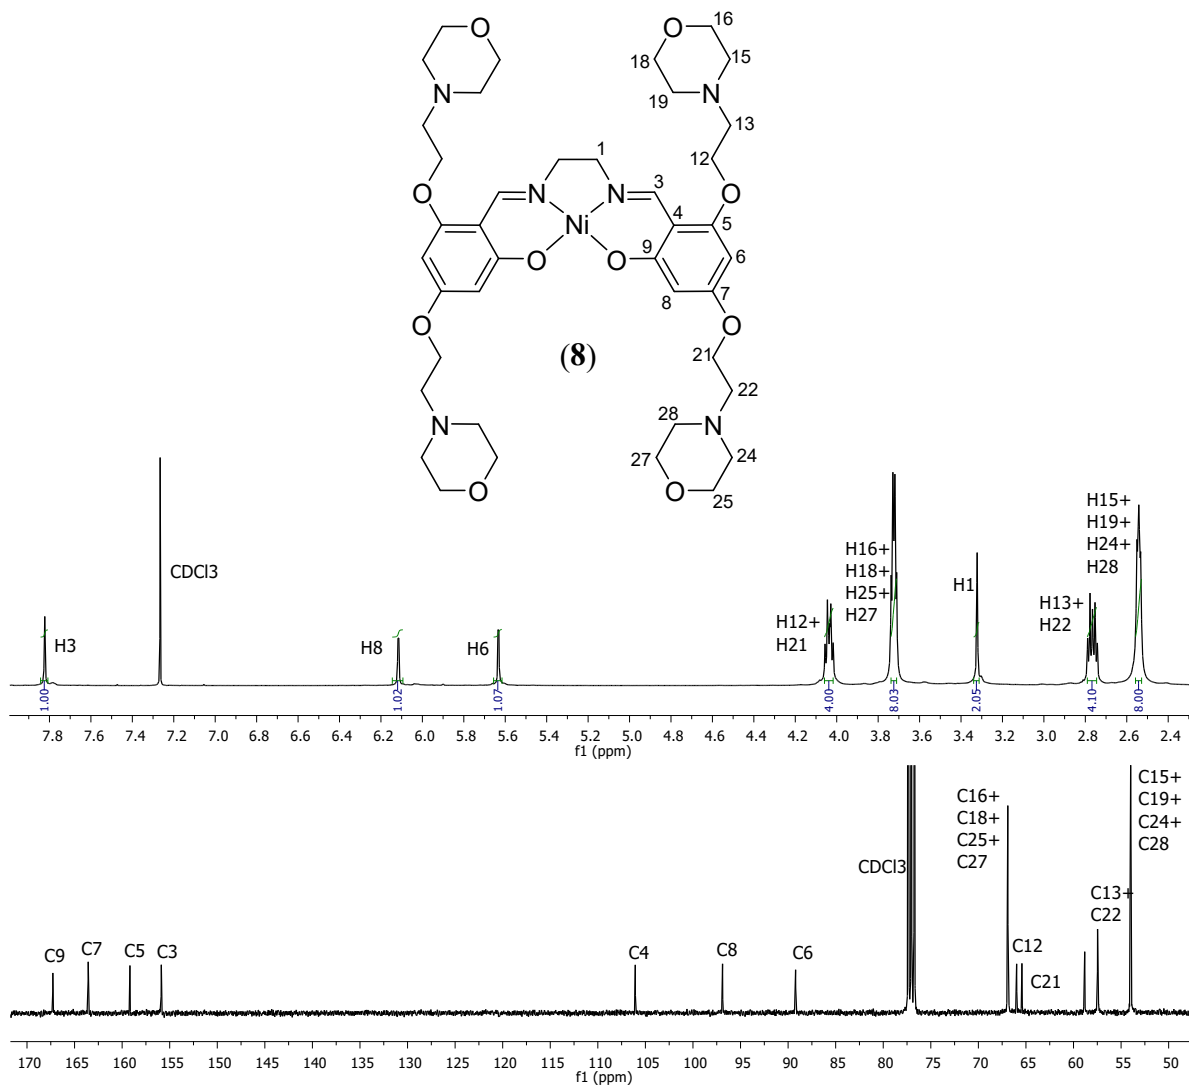

Figure S22: <sup>1</sup>H and <sup>13</sup>C NMR spectra of (8), with expansions of some signals, for clarity.



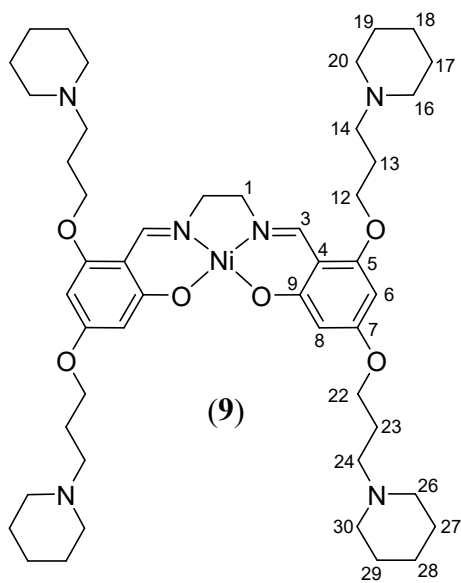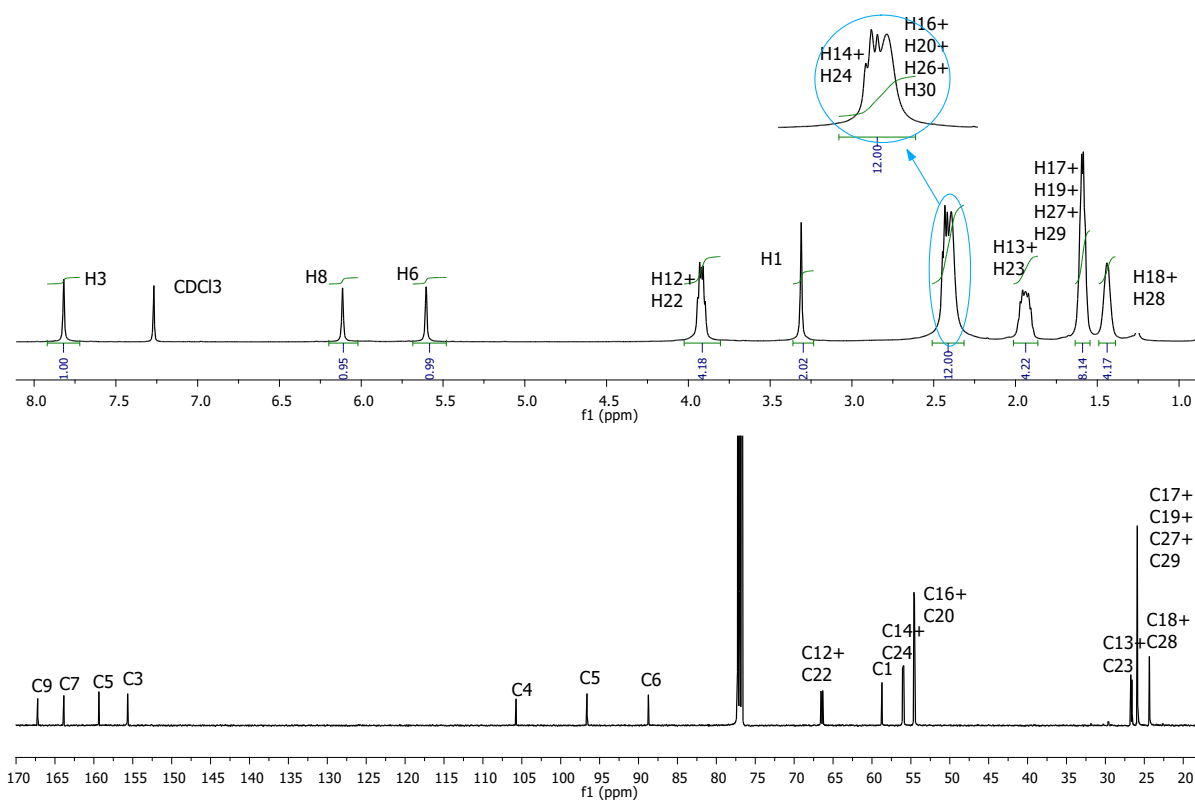

**Figure S23:**  $^1\text{H}$  and  $^{13}\text{C}$  NMR spectra of (9), with expansions of some signals, for clarity.

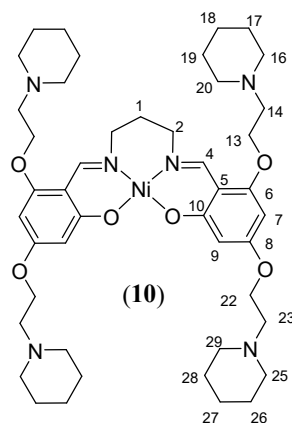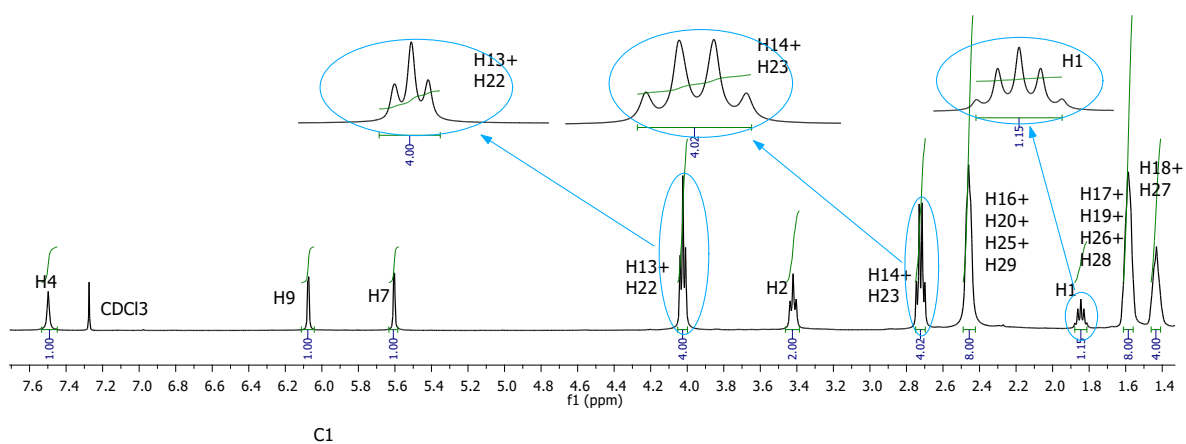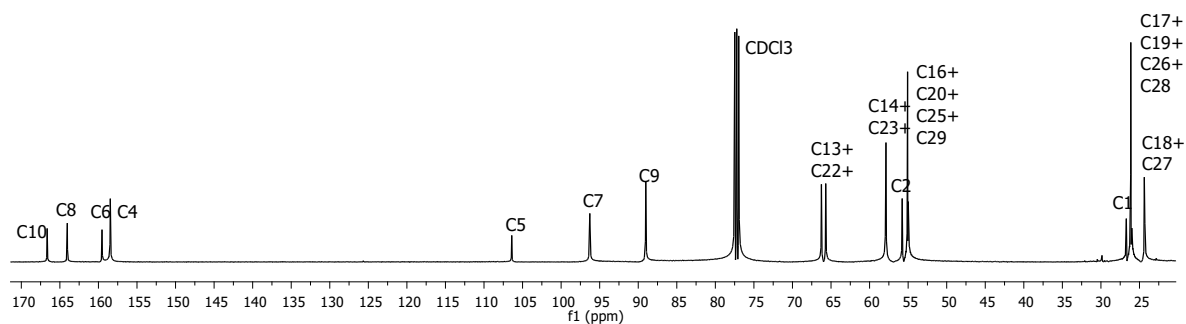

**Figure S24:**  $^1\text{H}$  and  $^{13}\text{C}$  NMR spectra of **(10)**, with expansions of some signals, for clarity.

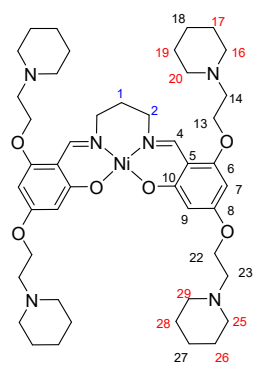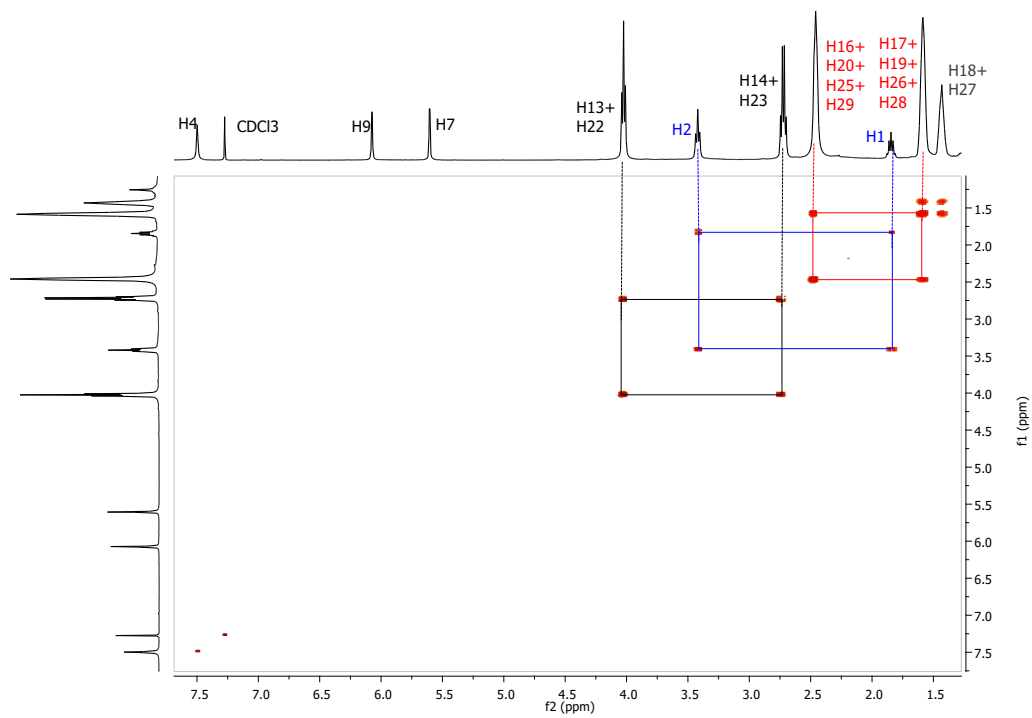

**Figure S25:** gCOSY spectrum of (**10**), with selected H-H correlations highlighted.

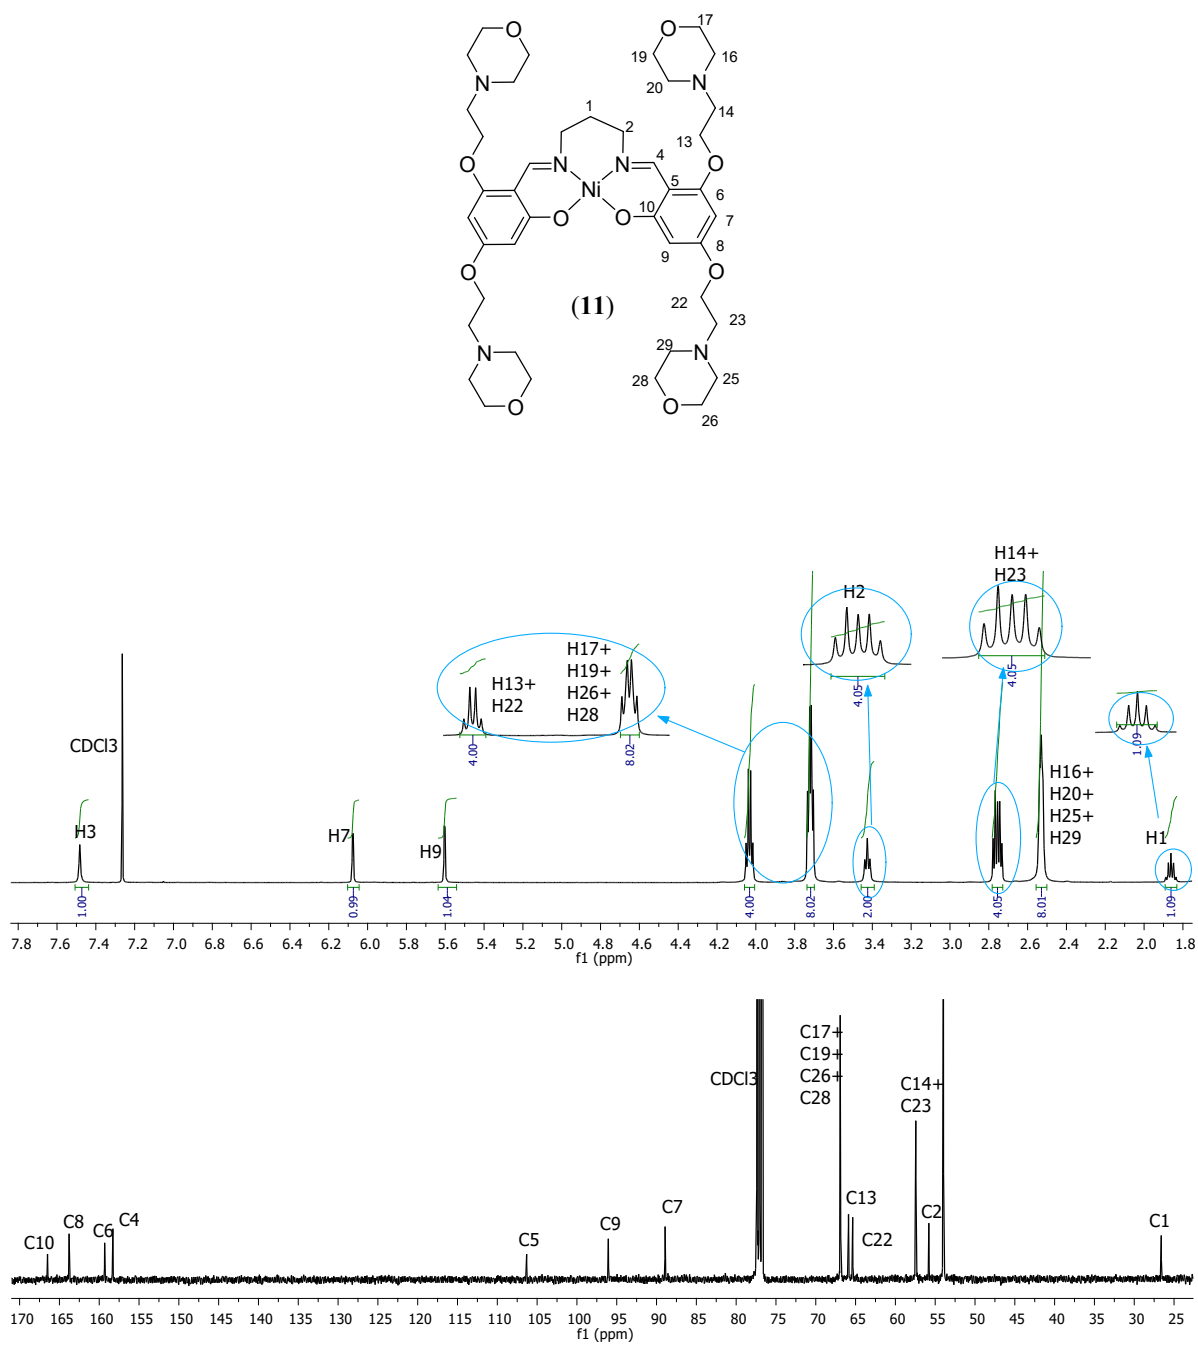

**Figure S26:** <sup>1</sup>H and <sup>13</sup>C NMR spectra of (11), with expansions of some signals, for clarity.

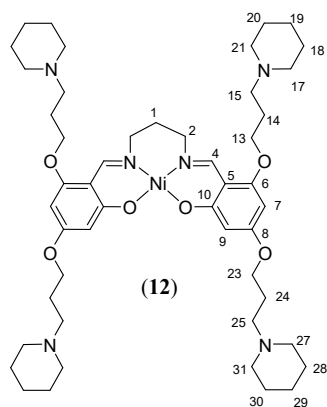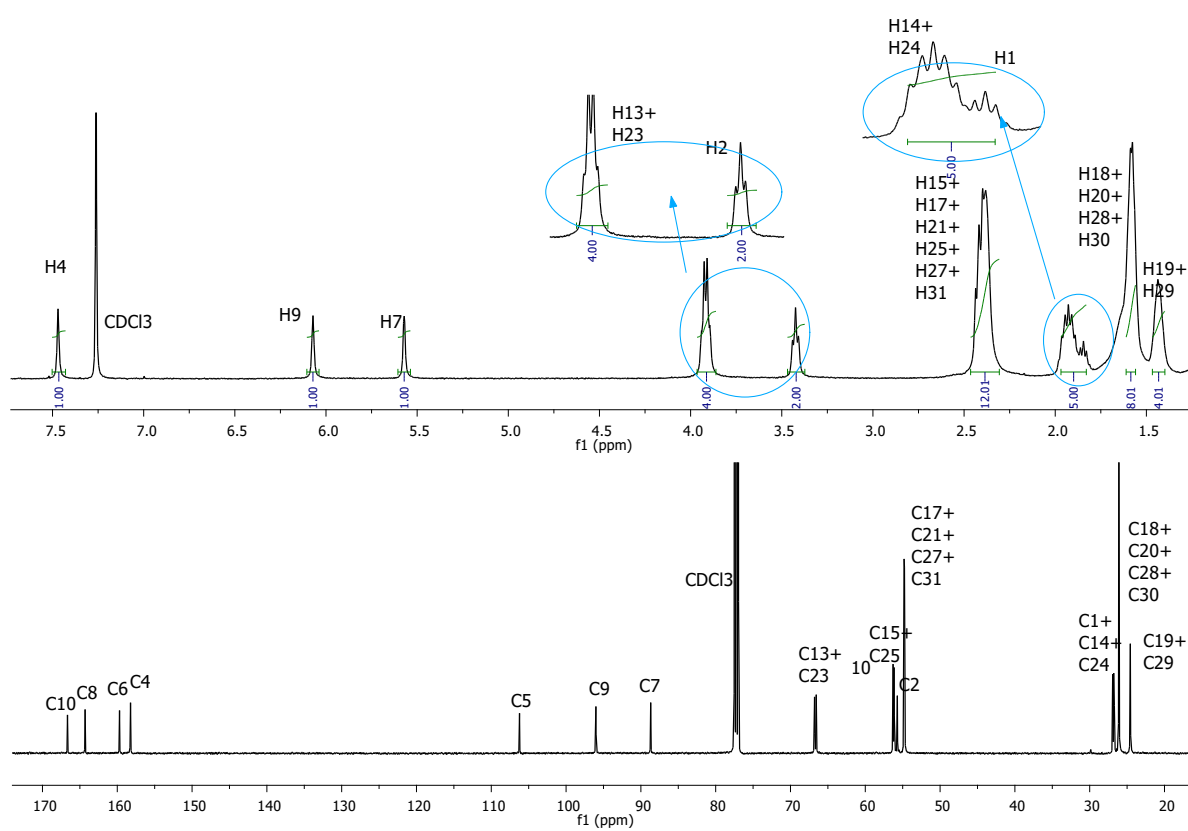

Figure S27:  $^1\text{H}$  and  $^{13}\text{C}$  NMR spectra of (12), with expansions of some signals, for clarity.

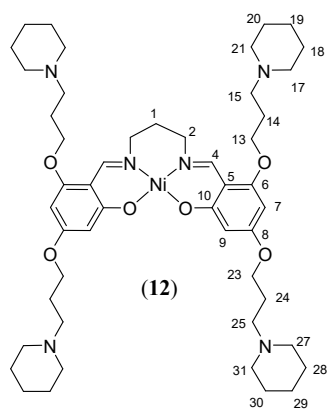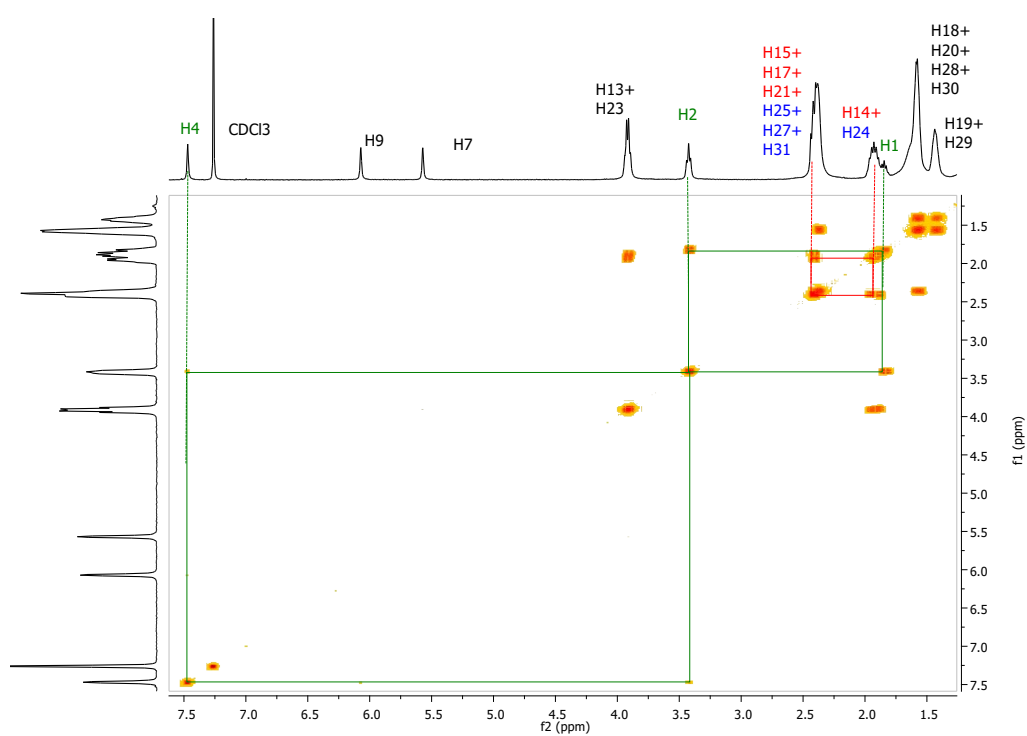

**Figure S28:** gCOSY spectrum of **(12)**, with selected H-H correlations highlighted.

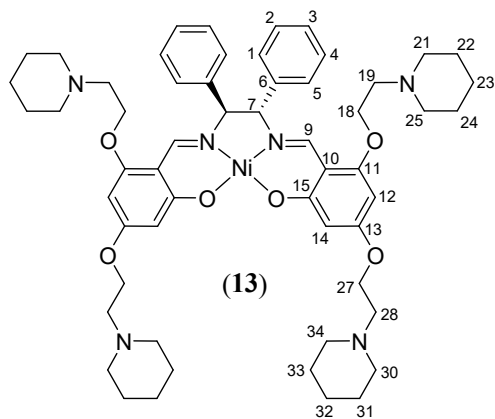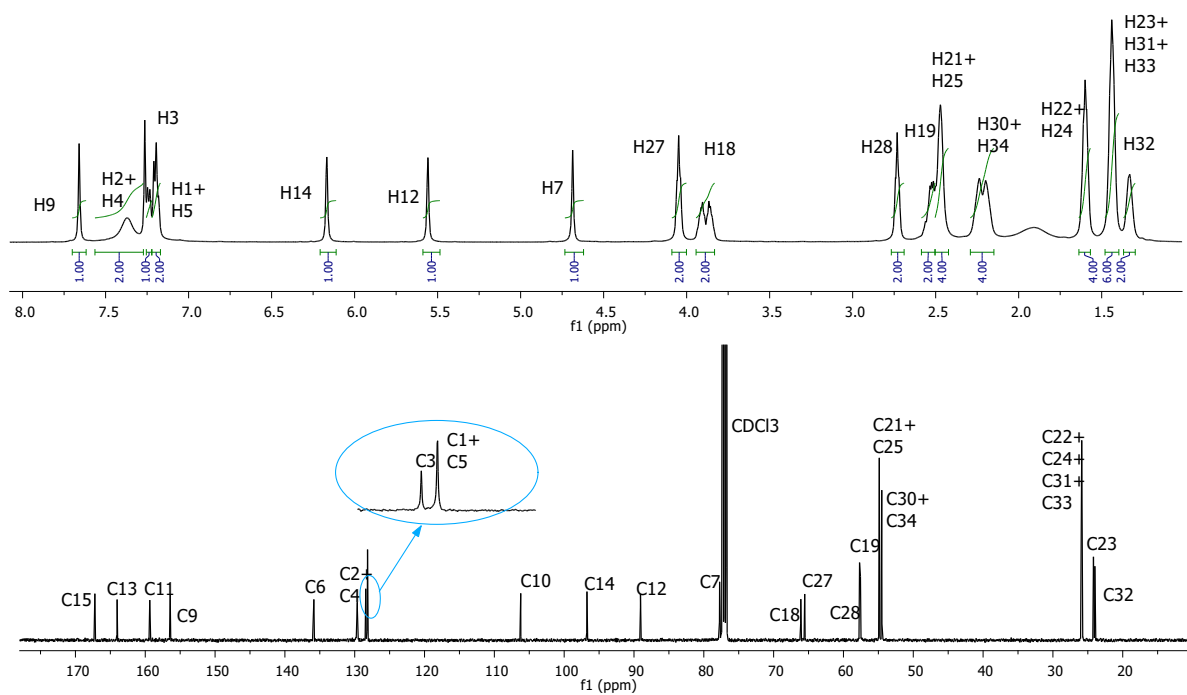

**Figure S29:**  $^1\text{H}$  and  $^{13}\text{C}$  NMR spectra of **(13)**, with expansions of some signals, for clarity.

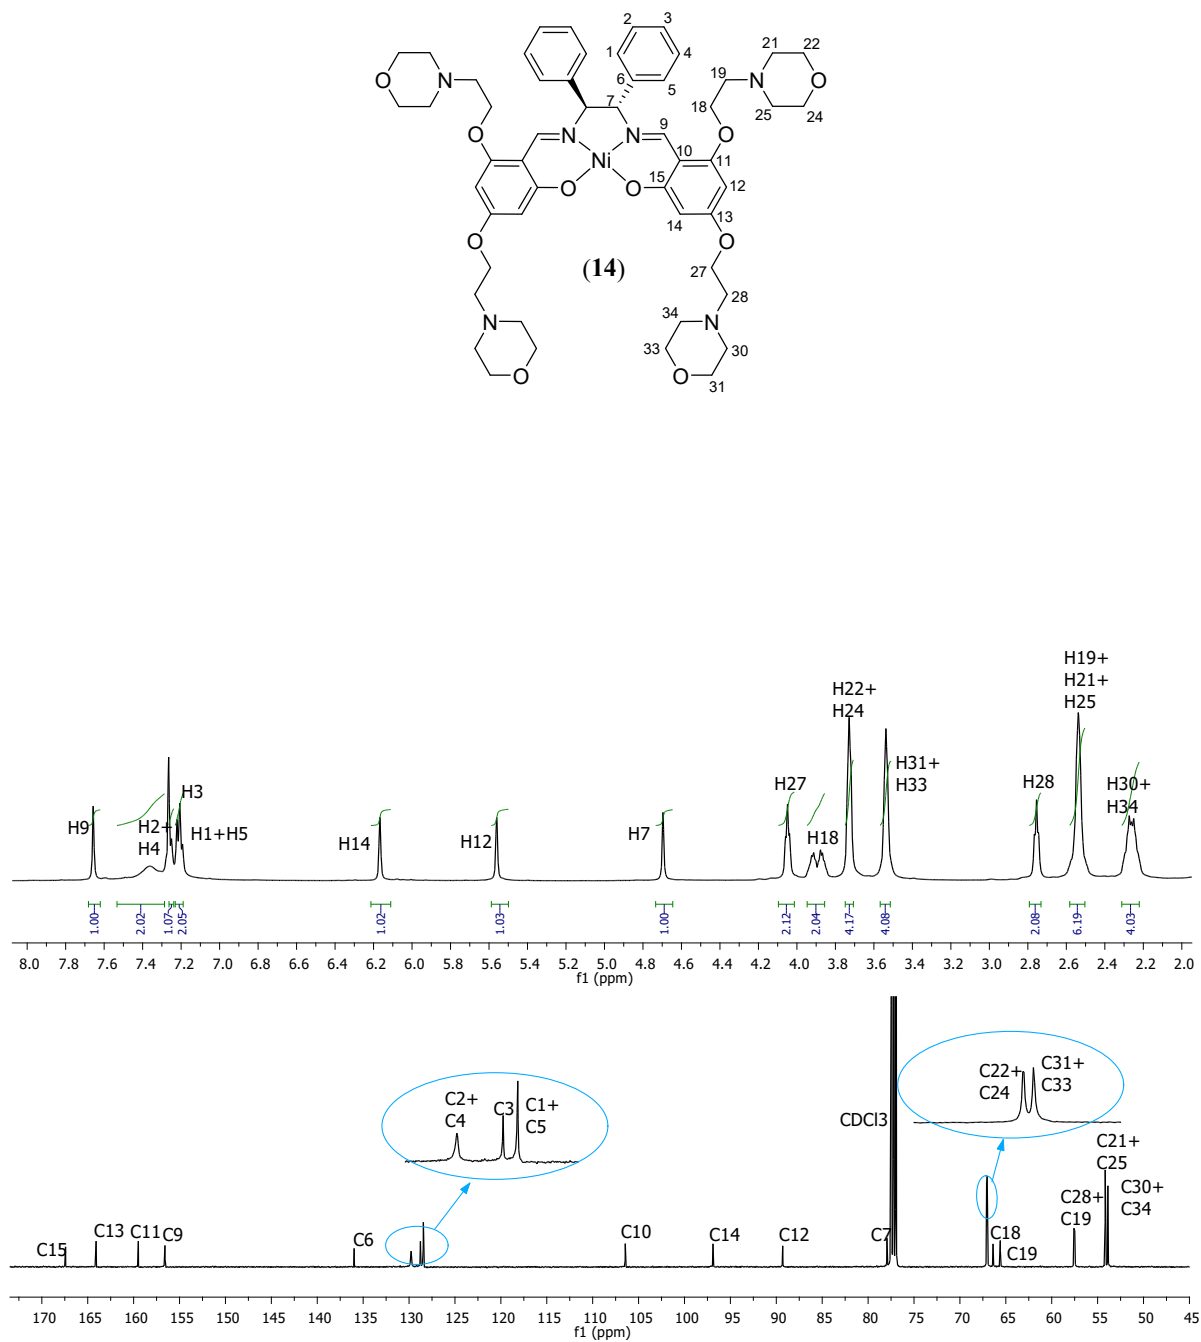

**Figure S30:**  $^1\text{H}$  and  $^{13}\text{C}$  NMR spectra of **(14)**, with expansions of some signals, for clarity.



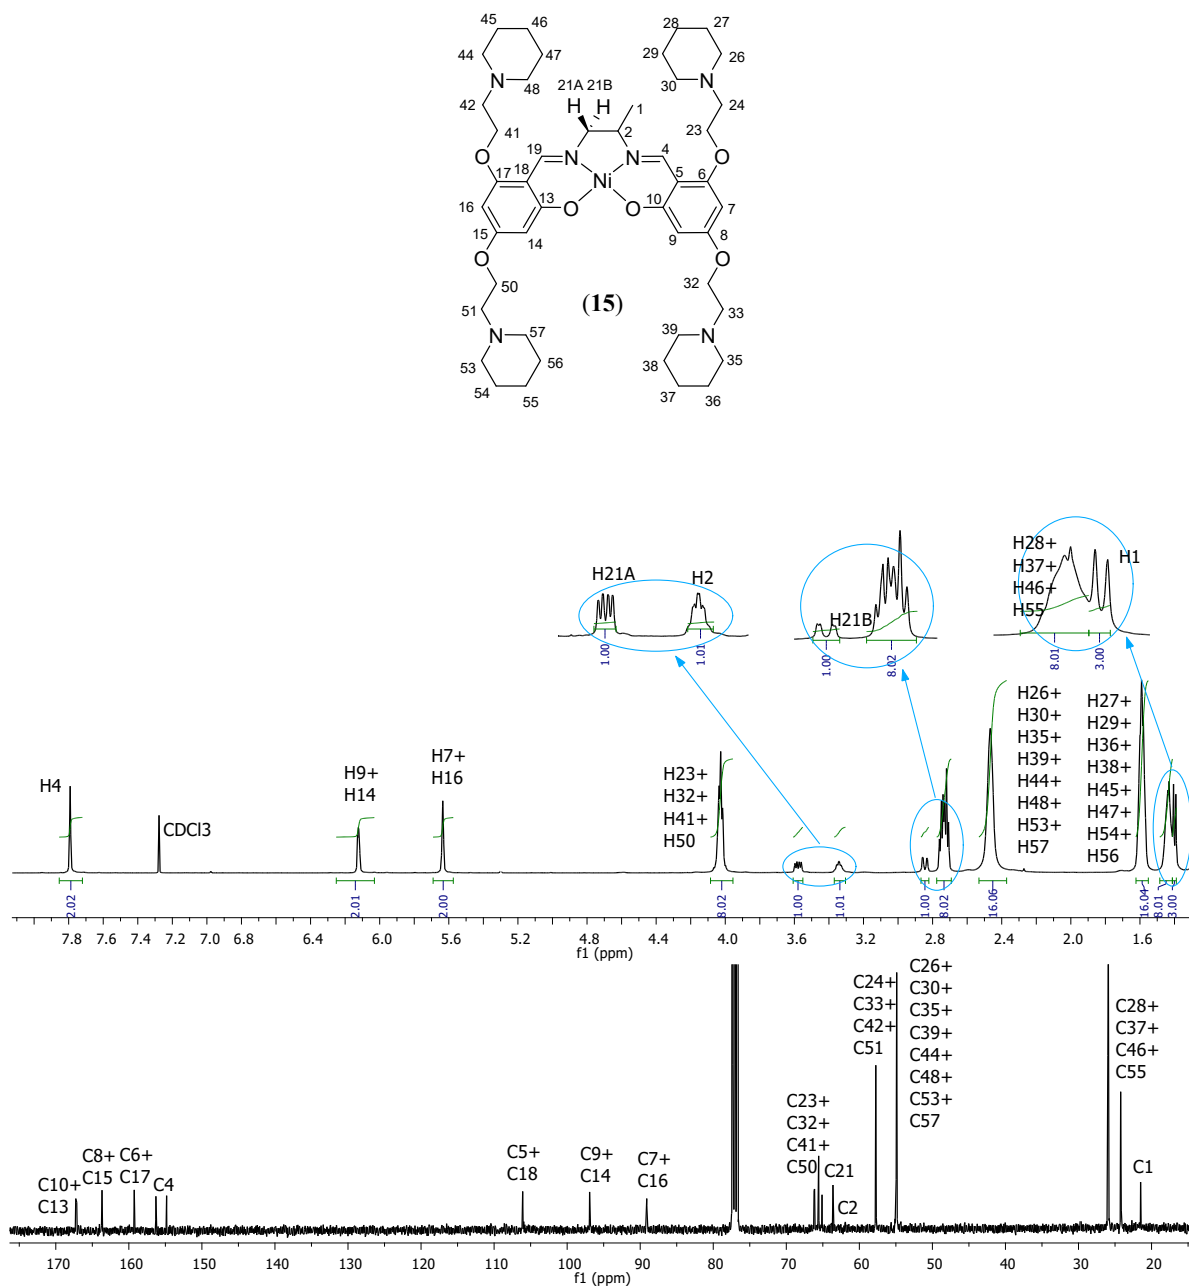

**Figure S31:**  $^1\text{H}$  and  $^{13}\text{C}$  NMR spectra of **(15)**, with expansions of some signals, for clarity.

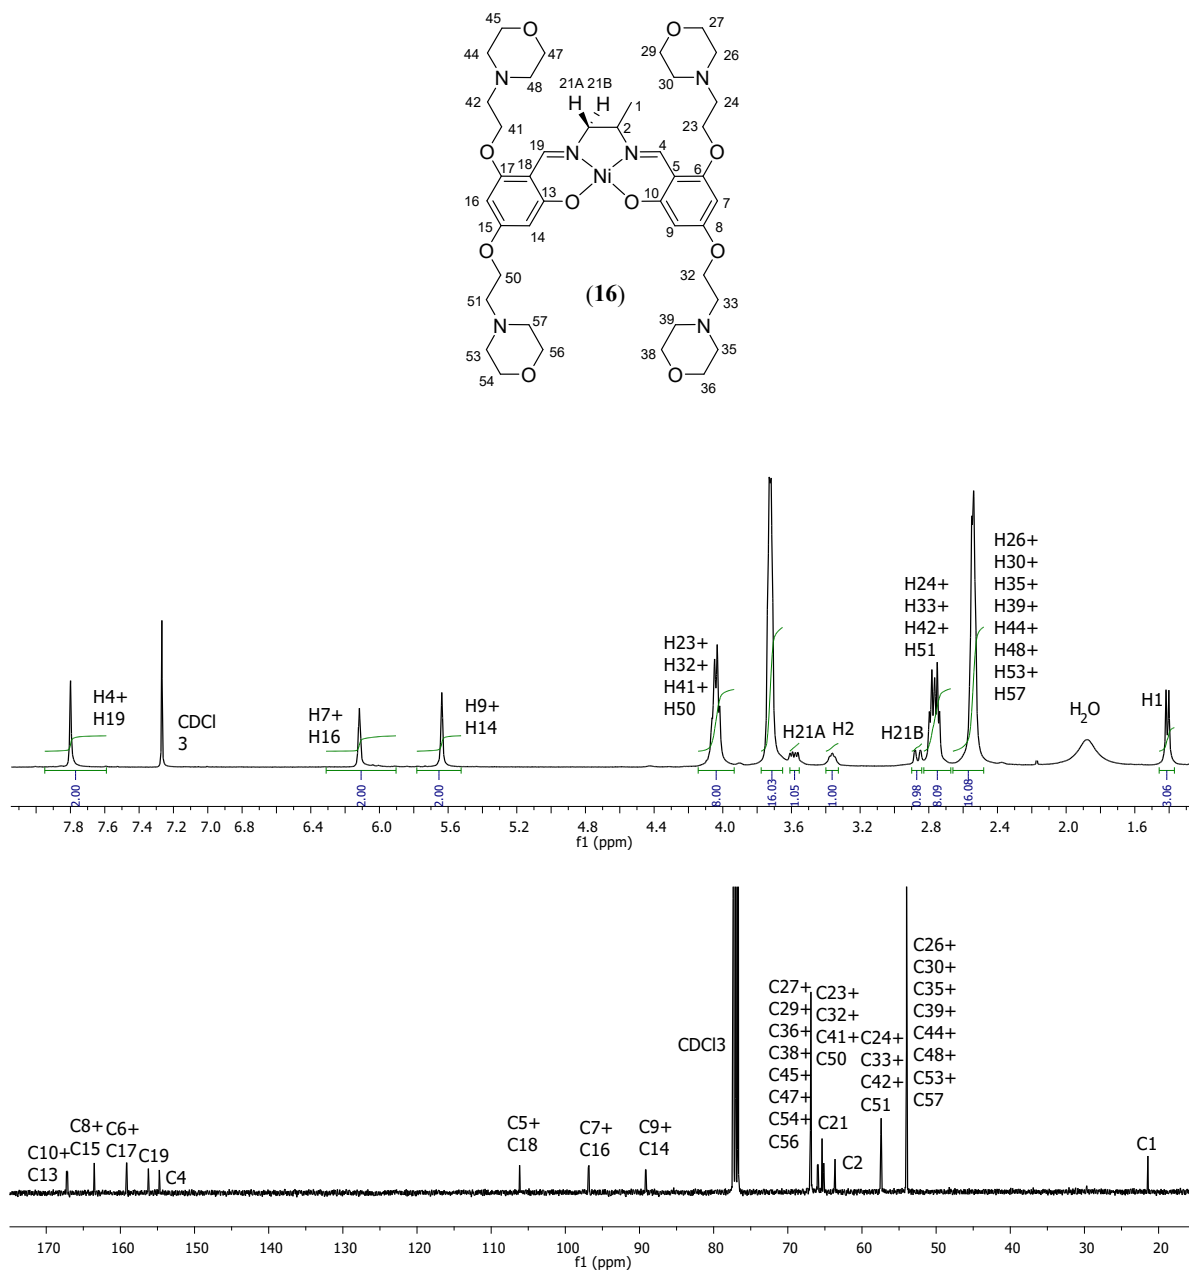

**Figure S32:** <sup>1</sup>H and <sup>13</sup>C NMR spectra of (16), with expansions of some signals, for clarity.

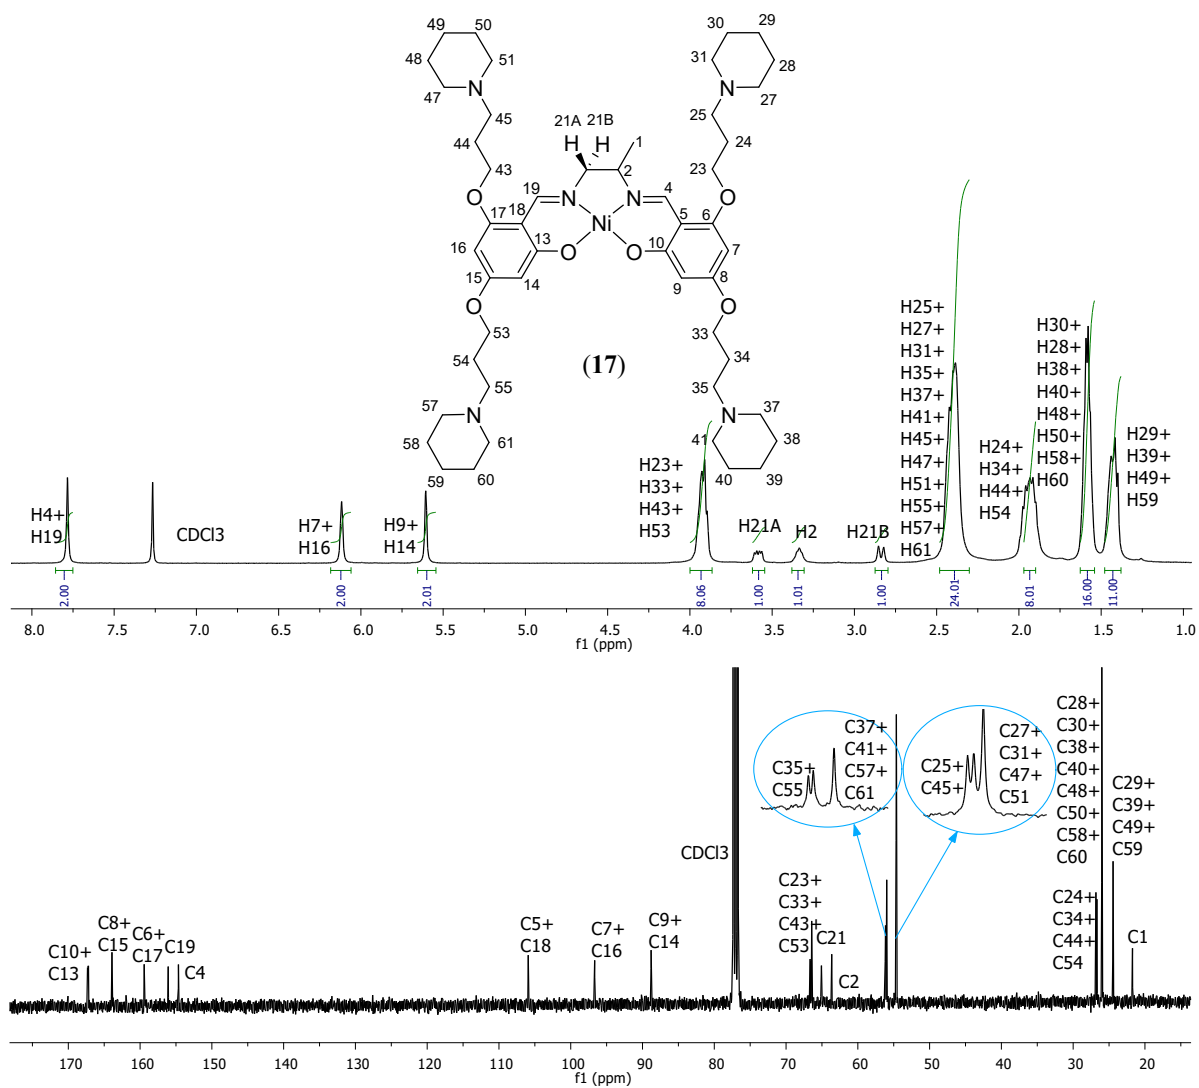

Figure S33:  $^1\text{H}$  and  $^{13}\text{C}$  NMR spectra of (17), with expansions of some signals, for clarity.
